# Supplementary material for: Associations between vision impairment and driving and the effectiveness of vision-related interventions: protocol for a systematic review and meta-analysis
Source: PubMed Central journal article supplement (PMC7646345; doi:10.1136/bmjopen-2020-040881), 2020-11-05
Supplement: bmjopen-2020-040881.draft_revisions.pdf [file bmjopen-2020-040881.draft_revisions.pdf]

# BMJ Open

BMJ Open is committed to open peer review. As part of this commitment we make the peer review history of every article we publish publicly available.

When an article is published we post the peer reviewers' comments and the authors' responses online. We also post the versions of the paper that were used during peer review. These are the versions that the peer review comments apply to.

The versions of the paper that follow are the versions that were submitted during the peer review process. They are not the versions of record or the final published versions. They should not be cited or distributed as the published version of this manuscript.

BMJ Open is an open access journal and the full, final, typeset and author-corrected version of record of the manuscript is available on our site with no access controls, subscription charges or pay-per-view fees (<http://bmjopen.bmj.com>).

If you have any questions on BMJ Open's open peer review process please email [info.bmjopen@bmj.com](mailto:info.bmjopen@bmj.com)

# BMJ Open

## Vision impairment and driving: protocol for a systematic review and meta-analysis of associations and the effectiveness of vision-related interventions

|                               |                                                                                                                                                                                                                                                                                                                                                                                                                                                                                                                                                                                                                                                                                                                                                                                                                                                                                                                                                                                                                                                                                                                                                                                                                                                                                         |
|-------------------------------|-----------------------------------------------------------------------------------------------------------------------------------------------------------------------------------------------------------------------------------------------------------------------------------------------------------------------------------------------------------------------------------------------------------------------------------------------------------------------------------------------------------------------------------------------------------------------------------------------------------------------------------------------------------------------------------------------------------------------------------------------------------------------------------------------------------------------------------------------------------------------------------------------------------------------------------------------------------------------------------------------------------------------------------------------------------------------------------------------------------------------------------------------------------------------------------------------------------------------------------------------------------------------------------------|
| Journal:                      | <i>BMJ Open</i>                                                                                                                                                                                                                                                                                                                                                                                                                                                                                                                                                                                                                                                                                                                                                                                                                                                                                                                                                                                                                                                                                                                                                                                                                                                                         |
| Manuscript ID                 | bmjopen-2020-040881                                                                                                                                                                                                                                                                                                                                                                                                                                                                                                                                                                                                                                                                                                                                                                                                                                                                                                                                                                                                                                                                                                                                                                                                                                                                     |
| Article Type:                 | Protocol                                                                                                                                                                                                                                                                                                                                                                                                                                                                                                                                                                                                                                                                                                                                                                                                                                                                                                                                                                                                                                                                                                                                                                                                                                                                                |
| Date Submitted by the Author: | 25-May-2020                                                                                                                                                                                                                                                                                                                                                                                                                                                                                                                                                                                                                                                                                                                                                                                                                                                                                                                                                                                                                                                                                                                                                                                                                                                                             |
| Complete List of Authors:     | <p>Nguyen, Helen; University of New South Wales<br/>           Di Tanna, Gian Luca; George Institute for Global Health,<br/>           Coxon, Kristy; Western Sydney University, School of Health Sciences<br/>           Brown, Julie; George Institute for Global Health, Injury<br/>           Ren, Kerrie; University of New South Wales<br/>           Ramke, Jacqueline; LSHTM,<br/>           Burton, Matthew J; London School of Hygiene and Tropical Medicine<br/>           Gordon, Iris<br/>           Zhang, Justine; London School of Hygiene and Tropical Medicine Faculty<br/>           of Infectious and Tropical Diseases, International Centre for Eye Health,<br/>           Clinical Research Department<br/>           Furtado, João; Universidade de São Paulo Faculdade de Medicina de<br/>           Ribeirão Preto, Division of Ophthalmology<br/>           Mdala, Shaffi; Queen Elizabeth Central Hospital, Ophthalmology<br/>           Department<br/>           Kitema, Gatera Fiston; University of Rwanda College of Medicine and<br/>           Health Sciences, Ophthalmology Department<br/>           Keay, Lisa; University of New South Wales, School of Optometry and<br/>           Vision Science; The George Institute for Global Health</p> |
| Keywords:                     | PUBLIC HEALTH, OPHTHALMOLOGY, EPIDEMIOLOGY                                                                                                                                                                                                                                                                                                                                                                                                                                                                                                                                                                                                                                                                                                                                                                                                                                                                                                                                                                                                                                                                                                                                                                                                                                              |
|                               |                                                                                                                                                                                                                                                                                                                                                                                                                                                                                                                                                                                                                                                                                                                                                                                                                                                                                                                                                                                                                                                                                                                                                                                                                                                                                         |

SCHOLARONE™  
Manuscripts

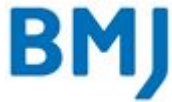

I, the Submitting Author has the right to grant and does grant on behalf of all authors of the Work (as defined in the below author licence), an exclusive licence and/or a non-exclusive licence for contributions from authors who are: i) UK Crown employees; ii) where BMJ has agreed a CC-BY licence shall apply, and/or iii) in accordance with the terms applicable for US Federal Government officers or employees acting as part of their official duties; on a worldwide, perpetual, irrevocable, royalty-free basis to BMJ Publishing Group Ltd ("BMJ") its licensees and where the relevant Journal is co-owned by BMJ to the co-owners of the Journal, to publish the Work in this journal and any other BMJ products and to exploit all rights, as set out in our [licence](#).

The Submitting Author accepts and understands that any supply made under these terms is made by BMJ to the Submitting Author unless you are acting as an employee on behalf of your employer or a postgraduate student of an affiliated institution which is paying any applicable article publishing charge ("APC") for Open Access articles. Where the Submitting Author wishes to make the Work available on an Open Access basis (and intends to pay the relevant APC), the terms of reuse of such Open Access shall be governed by a Creative Commons licence – details of these licences and which [Creative Commons](#) licence will apply to this Work are set out in our licence referred to above.

Other than as permitted in any relevant BMJ Author's Self Archiving Policies, I confirm this Work has not been accepted for publication elsewhere, is not being considered for publication elsewhere and does not duplicate material already published. I confirm all authors consent to publication of this Work and authorise the granting of this licence.

# Vision impairment and driving: protocol for a systematic review and meta-analysis of associations and the effectiveness of vision-related interventions

**Authors:** Helen Nguyen<sup>1</sup>, Gian Luca Di Tanna<sup>2</sup>, Kristy Coxon<sup>3</sup>, Julie Brown<sup>2</sup>, Kerrie Ren<sup>1</sup>, Jacqueline Ramke<sup>4,5</sup>, Matthew J Burton<sup>4,6</sup>, Iris Gordon<sup>4</sup>, Justine H Zhang<sup>4,7</sup>, João M. Furtado<sup>8</sup>, Shaffi Mdala<sup>9</sup>, Gatera Fiston Kitema<sup>10</sup>, Lisa Keay<sup>1,2</sup>

## **Affiliations:**

- 1 School of Optometry and Vision Science, Faculty of Science, The University of New South Wales, NSW, Australia
- 2 The George Institute for Global Health, Faculty of Medicine, University of New South Wales, NSW, Australia
- 3 School of Health Sciences, and the Translational Health Research Institute, Western Sydney University, NSW, Australia
- 4 International Centre for Eye Health, London School of Hygiene & Tropical Medicine, London, United Kingdom, WC1 E7HT
- 5 School of Optometry and Vision Science, University of Auckland, Auckland, New Zealand
- 6 Moorfields Eye Hospital, London, UK
- 7 Manchester Royal Eye Hospital, Manchester, United Kingdom
- 8 Division of Ophthalmology, Ribeirão Preto Medical School, University of São Paulo, Ribeirão Preto, São Paulo, Brazil
- 9 Ophthalmology Department, Queen Elizabeth Central Hospital, Blantyre, Malawi
- 10 Ophthalmology Department, School of Health Sciences, University of Rwanda, Kigali, Rwanda

**Corresponding Author:** Lisa Keay

Postal Address: School of Optometry and Vision Science, The University of New South Wales, Sydney UNSW NSW 2052, Australia

Email: [l.keay@unsw.edu.au](mailto:l.keay@unsw.edu.au)

**Keywords:** visual impairment, road traffic injuries, motor vehicle crashes, driving cessation, driving errors, driving performance, fatal crash involvement

**ABSTRACT**

**Introduction:** Driving is becoming one of the main modes of transport, however, safe driving requires a combination of visual, cognitive, and physical skills. With population ageing, the number of people living with vision impairment is set to increase in the decades ahead. Vision impairment may negatively impact an individual's ability to safely drive. The association between vision impairment and motor vehicle crash involvement or driving participation has yet to be systematically investigated. Further, the evidence for the effectiveness of vision-related interventions aimed at decreasing crashes and driving errors has not been synthesised.

**Methods and Analysis:** A search will be conducted for relevant studies on Medline (Ovid), EMBASE, and Global Health from their inception without date or geographical restrictions. Two investigators will independently screen abstracts and full-texts using Covidence software with conflicts resolved by a third investigator. Data extraction will be conducted on all included studies, and their quality assessed to determine risk of bias using the Joanna Briggs Institute (JBI) Critical Appraisal Tools. Outcome measures include crash risk, driving cessation, and surrogate measures of driving safety (e.g. driving errors and performance). The results of this review will be reported using the Preferred Reporting Items for Systematic Review and Meta-Analysis (PRISMA) guideline. Meta-analysis will be undertaken for outcomes with sufficient data and reported following the Meta-analyses of Observational Studies in Epidemiology (MOOSE) guideline. Where statistical pooling is not feasible or appropriate, narrative summaries will be presented following the Synthesis Without Meta-analysis (SWiM) in systematic reviews guideline.

**Ethics and dissemination:** This review will only report on published data thus no ethics approval is required. Results will be included in the *Lancet Global Health* Commission on Global Eye Health, published in a peer-reviewed journal, and presented at relevant conferences.

**PROSPERO registration number:** CRD42020172153

### STRENGTHS AND LIMITATIONS OF THIS STUDY

- Results from this review will present the first systematic collection of up-to-date evidence for the influence of vision impairment on road traffic injuries (RTIs) and the corresponding benefits of interventions to restore vision.
- As there are no time or place restrictions in the criteria for included studies this review will capture a large portion of English-language publications on this area
- Publication bias may arise as this review only looks at published studies in English so research from non-English speaking countries or those not yet in an open-access depository will be missed.
- Another potential limitation is that interventions and outcome measures may be highly heterogeneous which will affect the conclusions drawn from the results and prevent meta-analyses to be conducted for select outcomes.

## INTRODUCTION

According to the World Health Organisation (WHO),(1) approximately 1.35 million people die each year from road traffic injuries (RTIs), making it the eighth leading cause of death globally. Low- and middle income countries (LMICs) have lower rates of vehicle ownership compared to high-income countries (HIC), but over 90% of RTI fatalities occur in LMICs with the highest death rates in Africa. Without interventions, disparities in LMICs are set to grow alongside increases in motorisation consistent with globalisation. RTIs make up a major proportion of a country's economic and social burden,(2-4) and account for almost 30% of global injury-related disability.(2) In the face of increasing motorisation, achieving absolute reductions in RTIs is a challenge, especially for vulnerable road users such as pedestrians and users of powered two and three wheeler vehicles. This challenge has a direct impact on the UN's Sustainable Development Goals (SDGs), in particularly Target 3.6 which called for a halving of global road deaths by 2020, and Target 11.2 which called for safe and sustainable transport systems, especially for vulnerable road users.(5)

Motor vehicle crashes (MVCs), and by extension RTIs, however, are preventable. It has long been established that MVCs are multifactorial involving host (human), agent (vehicles and equipment), and environmental (physical and socioeconomic) factors(6) and this has evolved to the Safe System Approach endorsed in the United Nations Road Safety Collaboration's Decade of Action for Road Safety (2011-2020).(7) Road safety programs, such as the *Bloomberg Initiative for Global Road Safety (2015-2019)* focus on improving road safety through legislation in LMICs,(8) thus addressing the environmental and agent risks of RTIs. Beyond road infrastructure and vehicle quality, human driving behaviours or 'human factors' also contribute to RTI rates and are an intrinsic part of the Safe System Approach. Safe driving requires individuals to have a range of physical, visual, and cognitive skills. In addition to specific eye diseases, age-related functional declines across a range of domains, including vision, can reduce confidence in driving ability.(9) Poor visual acuity and contrast sensitivity, visual field loss, and glare sensitivity have all been identified as potential factors contributing to poor driving performance and increased MVCs.(10)

Due to the high visual demands needed to drive safely, standards have been set for vision, mostly for visual acuity. Jurisdictional control is used to identify individuals with vision impairment and restrict their access to driving privileges. However, a systematic review by Dobbs (2008) suggested that licencing policies aimed at identifying at-risk older drivers may not be effective in decreasing crash rates.(11) Conversely, in-person renewal policies which include vision tests completed at licence renewal centres, have been shown to reduce crash rates in older drivers.(12) An American study analysing data from the National Highway Traffic Safety Administration Fatal Accident Reporting

1  
2  
3 System found drivers aged 70 years and older who underwent visual acuity examinations during  
4 their licence renewals had lower fatal crash risks than their non-vision tested peers (RR 0.93; 95% CI  
5 0.89 – 0.97).(13) However, the literature remains divided in its support for using visual acuity alone  
6 as a predictor of MVC involvement and high-risk driving behaviours.(14) A Cochrane review,  
7 updated twice, examined the benefits of different vision screening procedures in randomised-  
8 controlled trials (RCTs) aimed at preventing RTIs and fatalities in older drivers.(15, 16) Unfortunately,  
9 no RCTs met the inclusion criteria for the review at the time these reviews were conducted.

10  
11 There is substantial literature investigating how vision impairment, and other aspects of function,  
12 affect road safety. Measures of driving safety have included indirect measures such as performance  
13 on driving simulators, on-road driving assessments, naturalistic driving or in-vehicle monitoring as  
14 well as direct measures of RTI and MVC rates from self-report or administrative datasets.(17, 18)  
15 However, the evidence for the influence of vision loss on MVCs and the corresponding benefits of  
16 interventions to restore vision have not been systematically evaluated. Since older drivers have  
17 higher crash involvement(19) and greater prevalence of eye diseases,(20) most research investigate  
18 older drivers and their risks of crashes and injuries. However, it is important to document the impact  
19 of vision impairment across all age groups. Further, information is also needed about specific eye  
20 diseases and types of vision impairment to inform interventions to screen for poor vision in drivers,  
21 and interventions to rehabilitate vision, thereby enhancing driver safety and continued ability to  
22 drive.

23  
24 The aim of this systematic review is to: 1) describe the associations between vision impairment and  
25 risk of road crash involvement across the lifespan, and 2) evaluate vision-related interventions to  
26 reduce crash risk. Secondary outcomes are driving cessation and surrogate measures of crash risk  
27 such as on-road driving errors.

## 28 29 30 31 32 33 34 35 36 37 38 39 40 41 42 43 44 **METHODS AND ANALYSIS**

45  
46 This systematic review protocol was drafted using the International Prospective Register of  
47 Systematic Reviews (PROSPERO) as a guideline and registered in PROSPERO (28/04/2020;  
48 CRD42020172153  
49 [[https://www.crd.york.ac.uk/prospero/display\\_record.php?ID=CRD42020172153](https://www.crd.york.ac.uk/prospero/display_record.php?ID=CRD42020172153)]). Any  
50 changes to the protocol will be updated in PROSPERO. The protocol is prepared in accordance to the  
51 Preferred Reporting Items for Systematic review and Meta-Analysis Protocols (PRISMA-P) statement  
52 (Appendix no. 1).(21)

## 53 54 55 56 57 58 59 60 **Eligibility Criteria**



1  
2  
3 This review will include human studies in the English language with full-text available. Both  
4 interventional (randomised controlled trials and quasi-experimental) and observational (cohort,  
5 cross-sectional, and case-control) studies will be considered. Systematic reviews will be included if  
6 meta-analysis was performed. For systematic reviews without meta-analysis, the reference list will  
7 be examined for potentially relevant articles, but the systematic review itself will not be included. All  
8 literature reviews, commentary articles, dissertations, abstracts, editorials, and conference  
9 presentations will be excluded. Studies which used driving simulators will be excluded as these are  
10 laboratory studies with only indirect measures of driving performance. Real-life driving experiences,  
11 such as limited exposure to driving at night, in bad weather, or during rush hour, may not be  
12 reflected in a simulation.<sup>(22)</sup> Additionally, the validity of driving simulator results are highly  
13 dependent upon the type of simulation program used and what kind of driving manoeuvre is being  
14 investigated.<sup>(23)</sup> Studies investigating either self-regulatory behaviours, such as night driving  
15 avoidance and decreasing travel mileage, or self-reported measures of driving safety, will also be  
16 excluded.  
17

18  
19  
20  
21  
22  
23  
24  
25  
26  
27 The population of focus will be drivers of four-wheeled motorised vehicles such as cars, buses, and  
28 trucks. Studies including drivers who have specific medical conditions (e.g. dementia, epilepsy, and  
29 stroke), or vision difficulties due to other medical factors (e.g. hemianopia caused by brain damage)  
30 will not be included. Similarly, articles where vision status is not reported will be excluded.  
31

32  
33  
34  
35 Exposures in the included studies will encompass all types of vision impairment including visual  
36 acuity, contrast sensitivity, visual field loss as well as impairments associated with specific eye  
37 diseases including but not limited to glaucoma, cataracts, aged-related macular degeneration (AMD),  
38 diabetic retinopathy (DR), stereopsis disorders, and colour vision deficiencies. Vision impairments  
39 can be categorised by the specific eye diseases or by specific measures of vision which can negatively  
40 impact normal everyday functioning. Interventions can include vision screening, refractive  
41 correction, cataract surgery or other measures to restore and improve vision of drivers in order to  
42 maintain driving participation, promote safe driving and reduce risk of crash involvement. The  
43 exposure comparators of included studies will be drivers who either do not have a vision impairment  
44 or have not received a vision-related intervention, within a timeframe chosen by the study in  
45 question.  
46  
47  
48  
49  
50  
51  
52  
53

#### 54 **Outcome Measures**

55  
56 The primary outcome measure is MVC involvement including fatal MVC involvement. Data on crash  
57 involvement and its severity can either come from self-reported surveys or data linkage with  
58  
59  
60

1  
2  
3 government and/or hospital records. Data from self-reported surveys will ensure that MVCs which  
4 were not serious enough to warrant a police or hospital report will be also be included.  
5  
6

7 Driving cessation and surrogate measures of driving safety will be the secondary outcomes. The  
8 surrogate measures of driving safety can include scores of driving performance from on-road driving  
9 tests or 'naturalistic' in-vehicle monitoring looking at manoeuvres such as lane keeping, braking, and  
10 abidance of road signage like traffic lights, stop and give way signs. A pass/fail threshold for driving  
11 performance scores will be decided upon by all investigators.  
12  
13  
14  
15

## 16 **Search Strategy**

17  
18 Electronic database search will be conducted by the Cochrane Eyes and Vision Information Specialist  
19 (IG) on Medline (Ovid), EMBASE, and Global Health from their inception to March 2020. Appendices  
20 2, 3, and 4 shows the search strategies for Medline, EMBASE, and Global Health, respectively.  
21  
22 Additional potentially relevant studies will be sought by experts in the field by checking the  
23 reference lists of included studies, and checking the reference list of narrative systematic reviews  
24 identified in the search.  
25  
26  
27  
28

## 29 **Data Collection and Analysis**

### 30 *Data Management and Selection*

31  
32 Each title and abstracts will be screened by two investigators independently (from HN, KR, JR, JZ, SM,  
33 JF, GFK) using Covidence systematic review management software (Veritas Health Innovation,  
34 Melbourne, Australia; available at <https://www.covidence.org/home>). Full-text review of potentially  
35 relevant articles will then be conducted by two investigators independently. Discrepancies will be  
36 discussed and resolved via consultation with a third investigator.  
37  
38  
39  
40  
41

### 42 *Data Extraction*

43  
44 Data extraction will be completed independently by two investigators (from among the same seven  
45 investigators). Data from included studies will be extracted using adaptations of the Joanna Briggs  
46 Institute (JBI) template for systematic reviews and observational studies (including cohort, cross-  
47 sectional, and case-control studies).(24) Adapted Cochrane templates will be used to extract data  
48 from randomized controlled trials and quasi-experimental studies.(25)  
49  
50  
51  
52  
53

### 54 *Quality Assessment*

55  
56 A quality assessment to determine an overall risk of bias will be carried out on all included studies  
57 independently by two investigators (from the seven investigators mentioned previously). Conflicts  
58 will be resolved by a third investigator. Relevant JBI critical appraisal tools will be used to evaluate  
59  
60

1  
2  
3 randomised controlled trials, quasi-experimental studies, systematic reviews, cohort studies, cross-  
4 sectional studies, and case-control studies.(26)

### 7 *Data Synthesis Strategy*

9 Measures of association between vision impairment/vision related interventions and MVC  
10 involvement, driving cessation and surrogate measures of driving safety will be summarized  
11 according to the outcome measures reported in the primary studies. In particular, appropriate  
12 hazard ratio (HR), risk ratio (RR), and odds ratio (OR) for binary data and (standardized) mean  
13 differences for continuous data will be statistically pooled. When the same outcome is reported as  
14 dichotomous data in some studies and as continuous data in others, these studies will be pooled by  
15 expressing the ORs as standardized mean differences and vice versa.(27) P-values of the driving  
16 outcomes will also be reported where appropriate.

17  
18 Where it is not possible or suitable to statistically pool the studies, a narrative summary of the  
19 findings will be used instead. Narrative summaries will follow the Synthesis Without Meta-analysis  
20 (SWiM) reporting guidelines.(28) Heterogeneity for all included studies will be assessed clinically,  
21 methodologically and statistically. Clinical heterogeneity will be assessed by comparing the  
22 differences between the participant characteristics (e.g. age, sex, eye disease), interventions and  
23 outcomes measured. The design and quality of included studies will be compared to assess  
24 methodological heterogeneity. Statistical heterogeneity will be explored by formal statistical test of  
25 heterogeneity, subgroup analyses and, if feasible, by meta-regression. Inconsistency of the effect  
26 sizes across the studies will be assessed by the proportion of variability in the effect sizes of the  
27 included studies due to heterogeneity (and not by sampling error) using  $I^2$ . Estimates will be pooled  
28 using random effects models with fixed effect models results also reported regardless of the values  
29 of  $I^2$ , and prediction intervals to allow for expected effects of future studies to be extrapolated based  
30 upon the current evidence.(29)

31  
32 The following outcomes will be assessed using meta-analysis where possible: crash involvement,  
33 driving cessation, and surrogate measures of un-safe driving i.e. driving errors and driving  
34 performance. Furthermore meta-analyses for each of the different eye diseases, and studies from  
35 LMIC settings will also be performed independently for each outcome of interest if possible. The  
36 Meta-analysis of Observational Studies in Epidemiology (MOOSE) guidelines will be used to guide  
37 reporting.(30) The Grading of Recommendations Assessment, Development and Evaluation (GRADE)  
38 approach will be used to assess the quality of evidence in the meta-analyses.(31)

39 Sensitivity analysis will be performed on low risk of bias studies whilst the meta-analysis will include  
40 all studies. This will assist with verifying the strength of the study findings and to assess how  
41  
42  
43  
44  
45  
46  
47  
48  
49  
50  
51  
52  
53  
54  
55  
56  
57  
58  
59  
60

1  
2  
3 different methodologies, sample sizes and statistical analyses have affected this study's results.  
4  
5 Furthermore, funnel plots will be used to assess publication bias.  
6

7 Corresponding authors from publications dated 2010 onwards with missing data of potential use will  
8 be approached via email, up to a maximum of 3 attempts, to request further information. Any  
9 unobtainable data will be noted alongside all attempts to contact the respective authors. Even  
10 though only available data will be used for the meta-analysis, the effects of any missing data will be  
11 considered and their effects discussed in the overall final review.  
12  
13  
14

### 15 **Patient and Public Involvement**

16 This review will only be looking at existing published literature. No patient or public involvement is  
17 currently planned for the design and execution of this review, however public participation may be  
18 sought for this review's dissemination.  
19  
20  
21  
22

### 23 **ETHICS AND DISSEMINATION**

24 As this review will only be focusing on currently published literature, ethics approval is not required.  
25 Results from this systematic review will be published in an open peer-reviewed journal and will form  
26 part of the ongoing *Lancet Global Health* Commission on Global Eye Health.(32) Where relevant, it  
27 will also be presented at conferences.  
28  
29  
30  
31  
32

### 33 **DISCUSSION**

#### 34 **Significance of this review**

35 The findings of this systematic review may influence future road safety policies on driving and care  
36 for people who would like to drive but have eye conditions which can cause vision impairment. By  
37 identifying the associations between vision and crash involvement, vision-related screening tests for  
38 licencing may be reconsidered and updated to increase relevance to driving safety. As mentioned  
39 previously, most reviews on driving with vision impairment have been limited to older drivers and  
40 the effects of different licencing renewal procedures on their ability to drive. Even though older  
41 drivers are at higher risk,(20) this review will seek to capture data on driving and vision impairment  
42 for all age groups.  
43  
44  
45  
46  
47  
48  
49

50 The eligibility criteria for included studies for this review will ensure that global data on vision and  
51 driving will be captured. Currently, MVC-related societal burdens and injury- related disability  
52 burdens in LMICs are poorly understood which may partially explain why cost-effective interventions  
53 in these countries are rarely undertaken.(2) LMICs tend to focus on legislative interventions,  
54 followed by education/training workshops, public awareness campaigns, enforcement measures,  
55 speed control and infrastructure improvements.(33) Current data on human factors specifically  
56  
57  
58  
59  
60

1  
2  
3 related to vision impairment in LMICs reported in this review may inform future evidence-based  
4 policies on licencing and/or screening policies to address these gaps.  
5  
6

7 This review may also be advantageous for the development of future vision-related interventions  
8 aimed at improving driving outcomes, in particular information on which interventions work best  
9 and for which eye disease. This in turn will further strengthen the evidence needed to improve  
10 policies around road safety for individuals with vision impairments.  
11  
12  
13  
14  
15  
16  
17  
18  
19  
20  
21  
22  
23  
24  
25  
26  
27  
28  
29  
30  
31  
32  
33  
34  
35  
36  
37  
38  
39  
40  
41  
42  
43  
44  
45  
46  
47  
48  
49  
50  
51  
52  
53  
54  
55  
56  
57  
58  
59  
60

For peer review only

## REFERENCES

- 1 World Health Organisation. Road Traffic Injuries 2020; <https://www.who.int/news-room/fact-sheets/detail/road-traffic-injuries> (accessed April 2020)
- 2 Bachani AM, Peden M, Gururaj G, et al. Road Traffic Injuries. In: Mock CN, Nugent R, Kobusingye O, Smith KR, eds. Injury Prevention and Environmental Health. Washington (DC): The International Bank for Reconstruction and Development / The World Bank © 2017 International Bank for Reconstruction and Development / The World Bank.; 2017.
- 3 Chen S, Kuhn M, Prettner K, et al. The global macroeconomic burden of road injuries: estimates and projections for 166 countries. *Lancet Planet Health* 2019;3(9):e390-e8. doi: 10.1016/S2542-5196(19)30170-6
- 4 Wijnen W, Stipdonk H. Social costs of road crashes: An international analysis. *Accid Anal Prev* 2016;94:97-106. doi: 10.1016/j.aap.2016.05.005 [published Online First: 3 June 2016]
- 5 United Nations. #Envision2030: 17 goals to transform the world for persons with disabilities; <https://www.un.org/development/desa/disabilities/envision2030.html> (accessed April 2020)
- 6 Haddon W, Jr. Energy damage and the ten countermeasure strategies. *J Trauma* 1973;13(4):321-31. doi: 10.1177/001872087301500407
- 7 The Department of Infrastructure, Regional Development and Communications: Australian Government. Decade of Action for Road Safety 2011-2020 2014; [https://www.infrastructure.gov.au/roads/safety/decade\\_of\\_action/index.aspx](https://www.infrastructure.gov.au/roads/safety/decade_of_action/index.aspx) (accessed April 2020)
- 8 Global Road Safety Partnership. Bloomberg Initiative for Global Road Safety; <https://www.grsproadsafety.org/programmes/bloomberg-initiative-global-road-safety/> (accessed April 2020)
- 9 Miller SM, Taylor-Piliae RE, Insel KC. The association of physical activity, cognitive processes and automobile driving ability in older adults: A review of the literature. *Geriatr Nurs* 2016;37(4):313-20. doi: 10.1016/j.gerinurse.2016.05.004 [published Online First: 31 May 2016]
- 10 Rubin GS, Ng ES, Bandeen-Roche K, et al. A prospective, population-based study of the role of visual impairment in motor vehicle crashes among older drivers: the SEE study. *Invest Ophthalmol Vis Sci* 2007;48(4):1483-91. doi: 10.1167/iovs.06-0474
- 11 Dobbs BM. Aging baby boomers--a blessing or challenge for driver licensing authorities. *Traffic Inj Prev* 2008;9(4):379-86. doi: 10.1080/15389580802045823
- 12 Grabowski DC, Campbell CM, Morrisey MA. Elderly licensure laws and motor vehicle fatalities. *JAMA* 2004;291(23):2840-6. doi: 10.1001/jama.291.23.2840
- 13 Levy DT, Vernick JS, Howard KA. Relationship between driver's license renewal policies and fatal crashes involving drivers 70 years or older. *JAMA* 1995;274(13):1026-30. doi: 10.1001/jama.1995.03530130032024
- 14 Owsley C, McGwin G, Jr. Vision impairment and driving. *Surv Ophthalmol* 1999;43(6):535-50.

- 1  
2  
3 15 Desapriya E, Harjee R, Brubacher J, et al. Vision screening of older drivers for preventing  
4 road traffic injuries and fatalities. *Cochrane Database Syst Rev* 2014(2):Cd006252. doi:  
5 10.1002/14651858.CD006252.pub3  
6  
7  
8 16 Subzwari S, Desapriya E, Babul-Wellar S, et al. Vision screening of older drivers for  
9 preventing road traffic injuries and fatalities. *Cochrane Database Syst Rev* 2009(1):Cd006252. doi:  
10 10.1002/14651858.CD006252.pub2  
11  
12 17 Imprialou M, Quddus M. Crash data quality for road safety research: Current state and  
13 future directions. *Accid Anal Prev* 2019;130:84-90. doi: 10.1016/j.aap.2017.02.022  
14  
15 18 Kaye SA, Lewis I, Freeman J. Comparison of self-report and objective measures of driving  
16 behavior and road safety: A systematic review. *J Safety Res* 2018;65:141-51. doi:  
17 10.1016/j.jsr.2018.02.012  
18  
19 19 Owsley C, Ball K, Sloane ME, et al. Visual/cognitive correlates of vehicle accidents in older  
20 drivers. *Psychol Aging* 1991;6(3):403-15. doi: 10.1037//0882-7974.6.3.403  
21  
22 20 Wood JM, Black AA. Ocular disease and driving. *Clin Exp Optom*. 2016;99(5):395-401. doi:  
23 10.1111/cxo.12391 [published Online First: 7 May 2016]  
24  
25 21 Shamseer L, Moher D, Clarke M, et al. Preferred reporting items for systematic review and  
26 meta-analysis protocols (PRISMA-P) 2015: elaboration and explanation. *BMJ* 2015;350:g7647. doi:  
27 10.1136/bmj.g7647  
28  
29 22 Keay L, West SK. Vision and Driving Performance in Elderly. In: Scholl HPN, Massof RW, West  
30 SK eds. *Ophthalmology and the Ageing Society*. Berlin Heidelberg: Springer-Verlag 2013:193-207.  
31  
32 23 Shechtman O, Classen S, Awadzi K, et al. Comparison of driving errors between on-the-road  
33 and simulated driving assessment: a validation study. *Traffic Inj Prev* 2009;10(4):379-85. doi:  
34 10.1080/15389580902894989  
35  
36 24 The Joanna Briggs Institute. Joanna Briggs Institute Reviewer's Manual. 2017. Available from:  
37 <https://reviewersmanual.joannabriggs.org/> (accessed April 2020)  
38  
39 25 Cochrane: Developmental PaLP. Data Extraction Forms 2014 [Available from:  
40 <https://dplp.cochrane.org/data-extraction-forms> (accessed April 2020).  
41  
42 26 University of Adelaide. Critical Appraisal Tools;  
43 [https://joannabriggs.org/ebp/critical\\_appraisal\\_tools](https://joannabriggs.org/ebp/critical_appraisal_tools) (assessed April 2020)  
44  
45 27 Anzures-Cabrera J, Sarpatwari A, Higgins JP. Expressing findings from meta-analyses of  
46 continuous outcomes in terms of risks. *Stat Med* 2011;30(25):2967-85. doi: 10.1002/sim.4298  
47 [published Online First: 8 August 2011]  
48  
49 28 Campbell M, McKenzie JE, Sowden A, et al. Synthesis without meta-analysis (SWiM) in  
50 systematic reviews: reporting guideline. *BMJ* 2020;368:l6890. doi: 10.1136/bmj.l6890  
51  
52 29 IntHout J, Ioannidis JP, Rovers MM, et al. Plea for routinely presenting prediction intervals in  
53 meta-analysis. *BMJ Open* 2016;6(7):e010247. doi: 10.1136/bmjopen-2015-010247  
54  
55  
56  
57  
58  
59  
60

- 1  
2  
3 30 Stroup DF, Berlin JA, Morton SC, et al. Meta-analysis of observational studies in  
4 epidemiology: a proposal for reporting. Meta-analysis Of Observational Studies in Epidemiology  
5 (MOOSE) group. *JAMA* 2000;283(15):2008-12. doi: 10.1001/jama.283.15.2008  
6  
7  
8 31 Iorio A, Spencer FA, Falavigna M, et al. Use of GRADE for assessment of evidence about  
9 prognosis: rating confidence in estimates of event rates in broad categories of patients. *BMJ*  
10 2015;350:h870. doi: 10.1136/bmj.h870  
11  
12 32 Burton MJ, Faal HB, Ramke J, et al. Announcing The Lancet Global Health Commission on  
13 Global Eye Health. *Lancet Glob Health* 2019;7(12):e1612-e3. doi: 10.1016/S2214-109X(19)30450-4  
14 [published Online First: 9 October 2019]  
15  
16 33 Staton C, Vissoci J, Gong E, et al. Road Traffic Injury Prevention Initiatives: A Systematic  
17 Review and Metasummary of Effectiveness in Low and Middle Income Countries. *PloS One*  
18 2016;11(1):e0144971. doi: 10.1371/journal.pone.0144971  
19  
20  
21  
22  
23  
24  
25  
26  
27  
28  
29  
30  
31  
32  
33  
34  
35  
36  
37  
38  
39  
40  
41  
42  
43  
44  
45  
46  
47  
48  
49  
50  
51  
52  
53  
54  
55  
56  
57  
58  
59  
60



1  
2  
3 **Authors' Contributions:** HN, LK, and JR conceived the idea for the review. HN drafted and revised  
4 the protocol with suggestions from LK, JR, JB, KC, GLdT, MJB, JZ, IG, JFM, SM, and GFK who reviewed  
5 the protocol and provided feedback on the draft. IG constructed the search. The final version of the  
6 manuscript was approved by all authors.  
7

8  
9 **Funding Statement:** MJB is supported by the Wellcome Trust (207472/Z/17/Z). JR is a Commonwealth  
10 Rutherford Fellow, funded by the UK government through the Commonwealth Scholarship  
11 Commission in the UK. The Lancet Global Health Commission on Global Eye Health is supported by  
12 The Queen Elizabeth Diamond Jubilee Trust, The Wellcome Trust, Sightsavers, The Fred Hollows  
13 Foundation, The SEVA Foundation, The British Council for the Prevention of Blindness and Christian  
14 Blind Mission.  
15  
16  
17  
18

19  
20 **Acknowledgements:** None.  
21

22 **Competing Interests:** None declared.  
23

24 **Number of Tables:** 0  
25

26 **Number of Figures:** 0  
27

28  
29 **Data Sharing Statement:** Data generated from this review will be available upon reasonable  
30 request from HN.  
31

32  
33 **Word Count:** 2848  
34  
35  
36  
37  
38  
39  
40  
41  
42  
43  
44  
45  
46  
47  
48  
49  
50  
51  
52  
53  
54  
55  
56  
57  
58  
59  
60

### Appendix 1. Preferred Reporting Items for Systematic review and Meta-analysis Protocols (PRISMA-P) 2015 Checklist

| Section and topic                 | Item No | Checklist item                                                                                                                                                                                                                | Page Number |
|-----------------------------------|---------|-------------------------------------------------------------------------------------------------------------------------------------------------------------------------------------------------------------------------------|-------------|
| <b>ADMINISTRATIVE INFORMATION</b> |         |                                                                                                                                                                                                                               |             |
| Title:                            |         |                                                                                                                                                                                                                               |             |
| Identification                    | 1a      | Identify the report as a protocol of a systematic review                                                                                                                                                                      | 1           |
| Update                            | 1b      | If the protocol is for an update of a previous systematic review, identify as such                                                                                                                                            | N/A         |
| Registration                      | 2       | If registered, provide the name of the registry (such as PROSPERO) and registration number                                                                                                                                    | 2, 5        |
| Authors:                          |         |                                                                                                                                                                                                                               |             |
| Contact                           | 3a      | Provide name, institutional affiliation, e-mail address of all protocol authors; provide physical mailing address of corresponding author                                                                                     | 1           |
| Contributions                     | 3b      | Describe contributions of protocol authors and identify the guarantor of the review                                                                                                                                           | 6, 7, 14    |
| Amendments                        | 4       | If the protocol represents an amendment of a previously completed or published protocol, identify as such and list changes; otherwise, state plan for documenting important protocol amendments                               | N/A         |
| Support:                          |         |                                                                                                                                                                                                                               |             |
| Sources                           | 5a      | Indicate sources of financial or other support for the review                                                                                                                                                                 | 14          |
| Sponsor                           | 5b      | Provide name for the review funder and/or sponsor                                                                                                                                                                             | 14          |
| Role of sponsor or funder         | 5c      | Describe roles of funder(s), sponsor(s), and/or institution(s), if any, in developing the protocol                                                                                                                            | 14          |
| <b>INTRODUCTION</b>               |         |                                                                                                                                                                                                                               |             |
| Rationale                         | 6       | Describe the rationale for the review in the context of what is already known                                                                                                                                                 | 4, 5        |
| Objectives                        | 7       | Provide an explicit statement of the question(s) the review will address with reference to participants, interventions, comparators, and outcomes (PICO)                                                                      | 5           |
| <b>METHODS</b>                    |         |                                                                                                                                                                                                                               |             |
| Eligibility criteria              | 8       | Specify the study characteristics (such as PICO, study design, setting, time frame) and report characteristics (such as years considered, language, publication status) to be used as criteria for eligibility for the review | 5, 6        |
| Information sources               | 9       | Describe all intended information sources (such as electronic databases, contact with study authors, trial registers or other grey literature sources) with planned dates of coverage                                         | 6, 7        |

|                                    |     |                                                                                                                                                                                                                                                  |                  |
|------------------------------------|-----|--------------------------------------------------------------------------------------------------------------------------------------------------------------------------------------------------------------------------------------------------|------------------|
| Search strategy                    | 10  | Present draft of search strategy to be used for at least one electronic database, including planned limits, such that it could be repeated                                                                                                       | Appendix no. 2-4 |
| Study records:                     |     |                                                                                                                                                                                                                                                  |                  |
| Data management                    | 11a | Describe the mechanism(s) that will be used to manage records and data throughout the review                                                                                                                                                     | 7                |
| Selection process                  | 11b | State the process that will be used for selecting studies (such as two independent reviewers) through each phase of the review (that is, screening, eligibility and inclusion in meta-analysis)                                                  | 7                |
| Data collection process            | 11c | Describe planned method of extracting data from reports (such as piloting forms, done independently, in duplicate), any processes for obtaining and confirming data from investigators                                                           | 7                |
| Data items                         | 12  | List and define all variables for which data will be sought (such as PICO items, funding sources), any pre-planned data assumptions and simplifications                                                                                          | 6, 7             |
| Outcomes and prioritization        | 13  | List and define all outcomes for which data will be sought, including prioritization of main and additional outcomes, with rationale                                                                                                             | 6, 7             |
| Risk of bias in individual studies | 14  | Describe anticipated methods for assessing risk of bias of individual studies, including whether this will be done at the outcome or study level, or both; state how this information will be used in data synthesis                             | 8, 9             |
| Data synthesis                     | 15a | Describe criteria under which study data will be quantitatively synthesised                                                                                                                                                                      | 8                |
|                                    | 15b | If data are appropriate for quantitative synthesis, describe planned summary measures, methods of handling data and methods of combining data from studies, including any planned exploration of consistency (such as $I^2$ , Kendall's $\tau$ ) | 8                |
|                                    | 15c | Describe any proposed additional analyses (such as sensitivity or subgroup analyses, meta-regression)                                                                                                                                            | 8, 9             |
|                                    | 15d | If quantitative synthesis is not appropriate, describe the type of summary planned                                                                                                                                                               | 2, 8             |
| Meta-bias(es)                      | 16  | Specify any planned assessment of meta-bias(es) (such as publication bias across studies, selective reporting within studies)                                                                                                                    | 8, 9             |
| Confidence in cumulative evidence  | 17  | Describe how the strength of the body of evidence will be assessed (such as GRADE)                                                                                                                                                               | 8                |

## Appendix 2. MEDLINE (OVID) search strategy

1. exp Eye Diseases/
2. exp Cataract Extraction/
3. Lens Implantation, Intraocular/
4. Lenses, Intraocular/
5. cataract\$.tw.
6. ((intraocular or intra ocular) adj3 lens\$).tw.
7. (IOL or IOLs).tw.
8. Vision Tests/
9. Visual Acuity/
10. exp Refractive Errors/
11. Visual Fields/
12. Visual Field Tests/
13. Contrast Sensitivity/
14. Depth Perception/
15. (visual adj2 (acuit\$ or field\$)).tw.
16. contrast sensitivity.tw.
17. (depth perception or stereopsis).tw.
18. ((impair\$ or decreas\$ or declin\$) adj3 (vision or visual\$ or sight\$)).tw.
19. (improv\$ adj3 (vision or visual\$ or sight\$)).tw.
20. ((visual or vision) adj2 function\$).tw.
21. exp Vision, Ocular/
22. Vision Screening/
23. or/1-22
24. Mass Screening/
25. ((eye\$ or sight or vision or visual\$) adj2 (test\$ or screen\$ or exam\$ or diagnos\$ or assess\$)).tw.
26. 24 and 25
27. 23 or 26
28. exp Motor Vehicles/
29. exp Automobile Driving/
30. Accidents, Traffic/
31. (driver\$ or driving).tw.
32. (automobile\$ or car or cars or vehicle\$).tw.
33. (motoring or motorcar or "motor car" or "motor cars").tw.
34. crash\$.tw.
35. ((road or traffic) adj2 injur\$).tw.
36. ((road or traffic or motor) adj2 (accident\$ or incident\$)).tw.
37. ((road or traffic or motor) adj2 collision\$).tw.
38. or/28-37
39. epidemiologic studies/ or case-control studies/ or cohort studies/ or observational study/ or follow-up studies/ or longitudinal studies/ or prospective studies/ or retrospective studies/ or controlled before-after studies/ or cross-sectional studies/ or historically controlled study/ or interrupted time series analysis/
40. epidemiologic methods/ or focus groups/ or interviews as topic/ or exp "surveys and questionnaires"/
41. epidemiologic research design/ or control groups/ or cross-over studies/ or double-blind method/ or meta-analysis as topic/ or network meta-analysis/ or random allocation/ or single-blind method/
42. epidemiologic methods/ or clinical trials as topic/ or feasibility studies/ or multicenter studies as topic/ or pilot projects/ or sampling studies/ or twin studies as topic/

- 1
- 2
- 3 43. randomized controlled trial/ or controlled clinical trials as topic/ or randomized controlled trials
- 4 as topic/
- 5 44. comparative study/ or evaluation studies/ or meta-analysis/ or review/ or multicenter study/ or
- 6 "systematic review"/ or validation studies/
- 7
- 8 45. health surveys/
- 9 46. outcome assessment, health care/
- 10 47. risk factors/
- 11 48. self report/
- 12 49. (population or cohort or observation\$ or intervention\$ or prospective or retrospective or
- 13 comparative).tw.
- 14 50. (questionnaire\$ or survey\$).tw.
- 15 51. (randomized or randomised or randomly or RCT).tw.
- 16 52. (systematic review or meta-analysis).tw.
- 17 53. (before adj2 after).tw.
- 18 54. (case\$ adj2 control\$).tw.
- 19 55. (cross adj1 section\$).tw.
- 20 56. or/39-55
- 21 57. 27 and 38
- 22 58. 56 and 57
- 23 59. vehicle-controlled.tw.
- 24 60. (vehicle adj3 inject\$).tw.
- 25 61. 59 or 60
- 26 62. 58 not 61
- 27 63. (animal\$ or mouse or mice\$ or dog or canine or rat or rats or primate\$).ti.
- 28 64. (dry eye or cell\$ or mutation\$ or genes or genome or sequencing).ti.
- 29 65. or/63-64
- 30 66. 62 not 65
- 31 67. limit 66 to english language
- 32 68. exp case reports/
- 33 69. (case adj2 report\$).tw.
- 34 70. 68 or 69
- 35 71. 67 not 70
- 36 72. limit 71 to (editorial or letter)
- 37 73. 71 not 72
- 38
- 39
- 40
- 41
- 42
- 43
- 44
- 45
- 46
- 47
- 48
- 49
- 50
- 51
- 52
- 53
- 54
- 55
- 56
- 57
- 58
- 59
- 60

### Appendix 3. EMBASE Search Strategy

1. exp eye disease/
2. exp cataract extraction/
3. lens implantation/
4. lens implant/
5. cataract\$.tw.
6. ((intraocular or intra ocular) adj3 lens\$).tw.
7. (IOL or IOLs).tw.
8. vision test/
9. visual acuity/
10. refractive error/
11. visual field/
12. perimetry/
13. contrast sensitivity/
14. depth perception/
15. (visual adj2 (acuit\$ or field\$)).tw.
16. contrast sensitivity.tw.
17. (depth perception or stereopsis).tw.
18. ((impair\$ or decreas\$ or declin\$) adj3 (vision or visual\$ or sight\$)).tw.
19. (improv\$ adj3 (vision or visual\$ or sight\$)).tw.
20. ((visual or vision) adj2 function\$).tw.
21. vision/
22. or/1-21
23. mass screening/
24. ((eye\$ or sight or vision or visual\$) adj2 (test\$ or screen\$ or exam\$ or diagnos\$ or assess\$)).tw.
25. 23 and 24
26. 22 or 25
27. exp car driving/
28. exp motor vehicle/
29. traffic accident/
30. (driver\$ or driving).tw.
31. (automobile\$ or car or cars or vehicle\$).tw.
32. (motoring or motorcar or "motor car" or "motor cars").tw.
33. crash\$.tw.
34. ((road or traffic) adj2 injur\$).tw.
35. ((road or traffic or motor) adj2 (accident\$ or incident\$)).tw.
36. ((road or traffic or motor) adj2 collision\$).tw.
37. or/27-36
38. study design/
39. controlled clinical trial/
40. case control study/
41. cohort analysis/
42. observational study/
43. follow up/
44. longitudinal study/
45. prospective study/
46. retrospective study/
47. epidemiology/
48. cross-sectional study/
49. control group/

- 1
- 2
- 3 50. crossover procedure/
- 4 51. "meta analysis (topic)"/
- 5 52. network meta-analysis/
- 6 53. randomization/
- 7 54. single blind procedure/
- 8 55. double blind procedure/
- 9 56. "clinical trial (topic)"/
- 10 57. "controlled clinical trial (topic)"/
- 11 58. "randomized controlled trial (topic)"/
- 12 59. "multicenter study (topic)"/
- 13 60. feasibility study/
- 14 61. pilot study/
- 15 62. comparative study/
- 16 63. evaluation study/
- 17 64. multicenter study/
- 18 65. randomized controlled trial/
- 19 66. meta analysis/
- 20 67. "systematic review"/
- 21 68. validation study/
- 22 69. interview/
- 23 70. questionnaire/
- 24 71. outcome assessment/
- 25 72. "systematic review (topic)"/
- 26 73. health survey/
- 27 74. risk factor/
- 28 75. self report/
- 29 76. evidence based practice/
- 30 77. (population or cohort or observation\$ or intervention\$ or prospective or retrospective or
- 31 comparative).tw.
- 32 78. (questionnaire\$ or survey\$).tw.
- 33 79. (randomized or randomised or randomly or RCT).tw.
- 34 80. (systematic review or meta-analysis).tw.
- 35 81. (before adj2 after).tw.
- 36 82. (case\$ adj2 control\$).tw.
- 37 83. (cross adj1 section\$).tw.
- 38 84. or/38-83
- 39 85. 26 and 37
- 40 86. 84 and 85
- 41 87. vehicle-controlled.tw.
- 42 88. (vehicle adj3 inject\$).tw.
- 43 89. or/87-88
- 44 90. 86 not 89
- 45 91. (animal\$ or mouse or mice\$ or dog or canine or rat or rats or primate\$).ti.
- 46 92. (dry eye or cell\$ or mutation\$ or genes or genome or sequencing).ti.
- 47 93. or/91-92
- 48 94. 90 not 93
- 49 95. limit 94 to conference abstract status
- 50 96. 94 not 95
- 51 97. limit 96 to english language
- 52 98. exp case report/
- 53 99. (case adj2 report\$).tw.
- 54
- 55
- 56
- 57
- 58
- 59
- 60

1  
2  
3 100. or/98-99

4 101. 97 not 100

5 102. limit 101 to (conference paper or "conference review" or editorial or letter or note)

6 103. 101 not 102  
7  
8  
9  
10  
11  
12  
13  
14  
15  
16  
17  
18  
19  
20  
21  
22  
23  
24  
25  
26  
27  
28  
29  
30  
31  
32  
33  
34  
35  
36  
37  
38  
39  
40  
41  
42  
43  
44  
45  
46  
47  
48  
49  
50  
51  
52  
53  
54  
55  
56  
57  
58  
59  
60

For peer review only



#### Appendix 4. GLOBAL HEALTH Search Strategy

1. exp eye diseases/
2. exp vision disorders/
3. cataract\$.tw.
4. ((intraocular or intra ocular) adj3 lens\$).tw.
5. (IOL or IOLs).tw.
6. (visual adj2 (acuit\$ or field\$)).tw.
7. contrast sensitivity.tw.
8. (depth perception or stereopsis).tw.
9. ((impair\$ or decreas\$ or declin\$) adj3 (vision or visual\$ or sight\$)).tw.
10. (improv\$ adj3 (vision or visual\$ or sight\$)).tw.
11. ((visual or vision) adj2 function\$).tw.
12. ((eye\$ or sight or vision or visual\$) adj2 (test\$ or screen\$ or exam\$ or diagnos\$ or assess\$)).tw.
13. or/1-12
14. drivers/
15. vehicles/
16. motor cars/
17. traffic/
18. traffic accidents/
19. (driver\$ or driving).tw.
20. (automobile\$ or car or cars or vehicle\$).tw.
21. (motoring or motorcar or "motor car" or "motor cars").tw.
22. crash\$.tw.
23. ((road or traffic) adj2 injur\$).tw.
24. ((road or traffic or motor) adj2 (accident\$ or incident\$)).tw.
25. ((road or traffic or motor) adj2 collision\$).tw.
26. or/14-25
27. cohort studies/
28. case-control studies/
29. longitudinal studies/
30. retrospective studies/
31. epidemiology/
32. exp clinical trials/
33. randomized controlled trials/
34. feasibility studies/
35. pilot projects/
36. meta-analysis/
37. systematic reviews/
38. reviews/
39. questionnaires/
40. surveys/
41. epidemiological surveys/
42. risk factors/
43. (population or cohort or observation\$ or intervention\$ or prospective or retrospective or comparative).tw.
44. (questionnaire\$ or survey\$).tw.
45. (randomized or randomised or randomly or RCT).tw.
46. (systematic review or meta-analysis).tw.
47. (before adj2 after).tw.
48. (case\$ adj2 control\$).tw.

- 1
- 2
- 3
- 4 49. (cross adj1 section\$.tw.
- 5 50. or/27-49
- 6 51. 13 and 26
- 7 52. 50 and 51
- 8 53. (animal\$ or mouse or mice\$ or dog or canine or rat or rats or primate\$.ti.
- 9 54. (dry eye or cell\$ or mutation\$ or genes or genome or sequencing).ti.
- 10 55. 53 or 54
- 11 56. 52 not 55
- 12 57. limit 56 to english language
- 13 58. case reports/
- 14 59. (case adj2 report\$.tw.
- 15 60. 58 or 59
- 16 61. 57 not 60
- 17 62. limit 61 to (conference or conference paper or conference proceedings or correspondence or
- 18 editorial or thesis)
- 19 63. 61 not 62
- 20
- 21
- 22
- 23
- 24
- 25
- 26
- 27
- 28
- 29
- 30
- 31
- 32
- 33
- 34
- 35
- 36
- 37
- 38
- 39
- 40
- 41
- 42
- 43
- 44
- 45
- 46
- 47
- 48
- 49
- 50
- 51
- 52
- 53
- 54
- 55
- 56
- 57
- 58
- 59
- 60

# BMJ Open

## Associations between vision impairment and driving and the effectiveness of vision-related interventions: protocol for a systematic review and meta-analysis

|                                 |                                                                                                                                                                                                                                                                                                                                                                                                                                                                                                                                                                                                                                                                                                                                                                                                                                                                                                                                                                                                                                                                                                                                                                                                                                                                                         |
|---------------------------------|-----------------------------------------------------------------------------------------------------------------------------------------------------------------------------------------------------------------------------------------------------------------------------------------------------------------------------------------------------------------------------------------------------------------------------------------------------------------------------------------------------------------------------------------------------------------------------------------------------------------------------------------------------------------------------------------------------------------------------------------------------------------------------------------------------------------------------------------------------------------------------------------------------------------------------------------------------------------------------------------------------------------------------------------------------------------------------------------------------------------------------------------------------------------------------------------------------------------------------------------------------------------------------------------|
| Journal:                        | <i>BMJ Open</i>                                                                                                                                                                                                                                                                                                                                                                                                                                                                                                                                                                                                                                                                                                                                                                                                                                                                                                                                                                                                                                                                                                                                                                                                                                                                         |
| Manuscript ID                   | bmjopen-2020-040881.R1                                                                                                                                                                                                                                                                                                                                                                                                                                                                                                                                                                                                                                                                                                                                                                                                                                                                                                                                                                                                                                                                                                                                                                                                                                                                  |
| Article Type:                   | Protocol                                                                                                                                                                                                                                                                                                                                                                                                                                                                                                                                                                                                                                                                                                                                                                                                                                                                                                                                                                                                                                                                                                                                                                                                                                                                                |
| Date Submitted by the Author:   | 22-Aug-2020                                                                                                                                                                                                                                                                                                                                                                                                                                                                                                                                                                                                                                                                                                                                                                                                                                                                                                                                                                                                                                                                                                                                                                                                                                                                             |
| Complete List of Authors:       | <p>Nguyen, Helen; University of New South Wales<br/>           Di Tanna, Gian Luca; George Institute for Global Health,<br/>           Coxon, Kristy; Western Sydney University, School of Health Sciences<br/>           Brown, Julie; George Institute for Global Health, Injury<br/>           Ren, Kerrie; University of New South Wales<br/>           Ramke, Jacqueline; LSHTM,<br/>           Burton, Matthew J; London School of Hygiene and Tropical Medicine<br/>           Gordon, Iris<br/>           Zhang, Justine; London School of Hygiene and Tropical Medicine Faculty<br/>           of Infectious and Tropical Diseases, International Centre for Eye Health,<br/>           Clinical Research Department<br/>           Furtado, João; Universidade de São Paulo Faculdade de Medicina de<br/>           Ribeirão Preto, Division of Ophthalmology<br/>           Mdala, Shaffi; Queen Elizabeth Central Hospital, Ophthalmology<br/>           Department<br/>           Kitema, Gatera Fiston; University of Rwanda College of Medicine and<br/>           Health Sciences, Ophthalmology Department<br/>           Keay, Lisa; University of New South Wales, School of Optometry and<br/>           Vision Science; The George Institute for Global Health</p> |
| <b>Primary Subject Heading</b>: | Ophthalmology                                                                                                                                                                                                                                                                                                                                                                                                                                                                                                                                                                                                                                                                                                                                                                                                                                                                                                                                                                                                                                                                                                                                                                                                                                                                           |
| Secondary Subject Heading:      | Public health                                                                                                                                                                                                                                                                                                                                                                                                                                                                                                                                                                                                                                                                                                                                                                                                                                                                                                                                                                                                                                                                                                                                                                                                                                                                           |
| Keywords:                       | PUBLIC HEALTH, OPHTHALMOLOGY, EPIDEMIOLOGY                                                                                                                                                                                                                                                                                                                                                                                                                                                                                                                                                                                                                                                                                                                                                                                                                                                                                                                                                                                                                                                                                                                                                                                                                                              |
|                                 |                                                                                                                                                                                                                                                                                                                                                                                                                                                                                                                                                                                                                                                                                                                                                                                                                                                                                                                                                                                                                                                                                                                                                                                                                                                                                         |

SCHOLARONE™  
Manuscripts



I, the Submitting Author has the right to grant and does grant on behalf of all authors of the Work (as defined in the below author licence), an exclusive licence and/or a non-exclusive licence for contributions from authors who are: i) UK Crown employees; ii) where BMJ has agreed a CC-BY licence shall apply, and/or iii) in accordance with the terms applicable for US Federal Government officers or employees acting as part of their official duties; on a worldwide, perpetual, irrevocable, royalty-free basis to BMJ Publishing Group Ltd ("BMJ") its licensees and where the relevant Journal is co-owned by BMJ to the co-owners of the Journal, to publish the Work in this journal and any other BMJ products and to exploit all rights, as set out in our [licence](#).

The Submitting Author accepts and understands that any supply made under these terms is made by BMJ to the Submitting Author unless you are acting as an employee on behalf of your employer or a postgraduate student of an affiliated institution which is paying any applicable article publishing charge ("APC") for Open Access articles. Where the Submitting Author wishes to make the Work available on an Open Access basis (and intends to pay the relevant APC), the terms of reuse of such Open Access shall be governed by a Creative Commons licence – details of these licences and which [Creative Commons](#) licence will apply to this Work are set out in our licence referred to above.

Other than as permitted in any relevant BMJ Author's Self Archiving Policies, I confirm this Work has not been accepted for publication elsewhere, is not being considered for publication elsewhere and does not duplicate material already published. I confirm all authors consent to publication of this Work and authorise the granting of this licence.

# Associations between vision impairment and driving and the effectiveness of vision-related interventions: protocol for a systematic review and meta-analysis

**Authors:** Helen Nguyen<sup>1</sup>, Gian Luca Di Tanna<sup>2</sup>, Kristy Coxon<sup>3</sup>, Julie Brown<sup>2</sup>, Kerrie Ren<sup>1</sup>, Jacqueline Ramke<sup>4,5</sup>, Matthew J Burton<sup>4,6</sup>, Iris Gordon<sup>4</sup>, Justine H Zhang<sup>4,7</sup>, João M. Furtado<sup>8</sup>, Shaffi Mdala<sup>9</sup>, Gatera Fiston Kitema<sup>10</sup>, Lisa Keay<sup>1,2</sup>

## **Affiliations:**

- 1 School of Optometry and Vision Science, Faculty of Science, The University of New South Wales, NSW, Australia
- 2 The George Institute for Global Health, Faculty of Medicine, University of New South Wales, NSW, Australia
- 3 School of Health Sciences, and the Translational Health Research Institute, Western Sydney University, NSW, Australia
- 4 International Centre for Eye Health, London School of Hygiene & Tropical Medicine, London, United Kingdom, WC1 E7HT
- 5 School of Optometry and Vision Science, University of Auckland, Auckland, New Zealand
- 6 Moorfields Eye Hospital, London, UK
- 7 Manchester Royal Eye Hospital, Manchester, United Kingdom
- 8 Division of Ophthalmology, Ribeirão Preto Medical School, University of São Paulo, Ribeirão Preto, São Paulo, Brazil
- 9 Ophthalmology Department, Queen Elizabeth Central Hospital, Blantyre, Malawi
- 10 Ophthalmology Department, School of Health Sciences, University of Rwanda, Kigali, Rwanda

**Corresponding Author:** Lisa Keay

Postal Address: School of Optometry and Vision Science, The University of New South Wales, Sydney UNSW NSW 2052, Australia

Email: [l.keay@unsw.edu.au](mailto:l.keay@unsw.edu.au)

**Keywords:** visual impairment, road traffic injuries, motor vehicle crashes, driving cessation, driving errors, driving performance, fatal crash involvement

**ABSTRACT**

**Introduction:** Driving is one of the main modes of transport with safe driving requiring a combination of visual, cognitive, and physical skills. With population ageing, the number of people living with vision impairment is set to increase in the decades ahead. Vision impairment may negatively impact an individual's ability to safely drive. The association between vision impairment and motor vehicle crash involvement or driving participation has yet to be systematically investigated. Further, the evidence for the effectiveness of vision-related interventions aimed at decreasing crashes and driving errors has not been synthesised.

**Methods and Analysis:** A search will be conducted for relevant studies on Medline (Ovid), EMBASE, and Global Health from their inception without date or geographical restrictions. Two investigators will independently screen abstracts and full-texts using Covidence software with conflicts resolved by a third investigator. Data extraction will be conducted on all included studies, and their quality assessed to determine risk of bias using the Joanna Briggs Institute (JBI) Critical Appraisal Tools. Outcome measures include crash risk, driving cessation, and surrogate measures of driving safety (e.g. driving errors and performance). The results of this review will be reported using the Preferred Reporting Items for Systematic Review and Meta-Analysis (PRISMA) guideline. Meta-analysis will be undertaken for outcomes with sufficient data and reported following the Meta-analyses of Observational Studies in Epidemiology (MOOSE) guideline. Where statistical pooling is not feasible or appropriate, narrative summaries will be presented following the Synthesis Without Meta-analysis (SWiM) in systematic reviews guideline.

**Ethics and dissemination:** This review will only report on published data thus no ethics approval is required. Results will be included in the *Lancet Global Health* Commission on Global Eye Health, published in a peer-reviewed journal, and presented at relevant conferences.

**PROSPERO registration number:** CRD42020172153

### STRENGTHS AND LIMITATIONS OF THIS STUDY

- Results from this systematic review will present up-to-date evidence for the influence of vision impairment on road traffic injuries (RTIs) and the effectiveness of vision-related interventions.
- As there are no geographic restrictions in the criteria for included studies, this review will capture a large portion of English-language publications on this area with findings applicable to a global context.
- This review will not restrict the age of the target population allowing evidence on the impact of vision impairment and driving to be documented for all age groups.
- This review only looks at published studies in English, so research from non-English speaking countries will be missed, which could introduce bias
- Another potential limitation is that interventions and outcome measures may be highly heterogeneous which will affect the conclusions drawn from the results and prevent meta-analyses to be conducted for select outcomes.

## INTRODUCTION

According to the World Health Organisation (WHO),(1) approximately 1.35 million people die each year from road traffic injuries (RTIs), making it the eighth leading cause of death globally. Low- and middle income countries (LMICs) have lower rates of vehicle ownership compared to high-income countries (HIC), but over 90% of RTI fatalities occur in LMICs with the highest death rates in Africa. Individuals from lower socioeconomic backgrounds living in HICs are also more likely to be involved in a road crash resulting in injuries. RTIs make up a major proportion of a country's economic and social burden,(2-4) and account for almost 30% of global injury-related disability.(2) In the face of increasing motorisation, achieving absolute reductions in RTIs is a challenge, especially for vulnerable road users such as pedestrians and users of powered two and three wheeler vehicles. This challenge has a direct impact on the UN's Sustainable Development Goals (SDGs), in particularly Target 3.6 which called for a halving of global road deaths by 2020, and Target 11.2 which called for safe and sustainable transport systems, especially for vulnerable road users.(5)

Motor vehicle crashes (MVCs), and by extension RTIs, however, are preventable. Using the Haddon Matrix, an early theory describing the multifactorial nature of RTIs, MVCs are understood to involve host (human), agent (vehicles and equipment), and environmental (physical and socioeconomic) factors(6). This theory has since been used to build the Safe System Approach endorsed in the United Nations Road Safety Collaboration's Decade of Action for Road Safety (2011-2020).(7) In brief, the Safe System Approach aims to prevent MVCs which result in serious injuries or death by addressing four main pillars of focus: 1) safe roads, 2) safe speeds, 3) safe people and 4) safe vehicles.(8) Road safety programs, such as the *Bloomberg Initiative for Global Road Safety (2015-2019)* focus on improving road safety through legislation in LMICs,(9) thus addressing the environmental and agent risks of RTIs. Beyond road infrastructure and vehicle quality, human driving behaviours or 'human factors' also contribute to RTI rates and are an intrinsic part of the Safe System Approach. Safe driving requires individuals to have a range of physical, visual, and cognitive skills. In addition to specific eye diseases, age-related functional declines across a range of domains, including vision, can reduce confidence in driving ability.(10) Poor visual acuity and contrast sensitivity, visual field loss, and glare sensitivity have all been identified as potential factors contributing to poor driving performance and increased MVCs.(11)

Due to the high visual demands needed to drive safely, many countries have set federal and or state-specific standards for vision, mostly for visual acuity. Most countries accept that a visual acuity of at least 6/12 (0.50, 20/40) in the better eye as the requirement for driving. This threshold dictates jurisdictional control used to identify individuals with vision impairment and restrict their access to



1  
2  
3 driving privileges. However, a systematic review by Dobbs (2008) suggested that licencing policies  
4 aimed at identifying at-risk older drivers may not be effective in decreasing crash rates.(12) This  
5 may be because policies which govern licensure and vision screening vary significantly between and  
6 within countries. Further, evidence on their effectiveness is inconclusive.(13) Conversely, in-person  
7 renewal policies which include vision tests completed at licence renewal centres, have been shown  
8 to reduce crash rates in older drivers.(14) An American study analysing data from the National  
9 Highway Traffic Safety Administration Fatal Accident Reporting System found drivers aged 70 years  
10 and older who underwent visual acuity examinations during their licence renewals had lower fatal  
11 crash risks than their non-vision tested peers (RR 0.93; 95% CI 0.89 – 0.97).(15) However, the  
12 literature remains divided in its support for using visual acuity alone as a predictor of MVC  
13 involvement and high-risk driving behaviours.(16) A Cochrane review, updated twice, examined the  
14 benefits of different vision screening procedures, such as visual acuity, visual field (central or  
15 peripheral), contrast sensitivity, and useful field of view (UFOV) tests, in randomised-controlled trials  
16 (RCTs) aimed at preventing RTIs and fatalities in older drivers.(13, 17) Unfortunately, no RCTs met  
17 the inclusion criteria for the review at the time these reviews were conducted.

18  
19  
20  
21  
22  
23  
24  
25  
26  
27  
28  
29  
30  
31  
32  
33  
34  
35  
36  
37  
38  
39  
40  
41  
42  
43  
44  
45  
46  
47  
48  
49  
50  
51  
52  
53  
54  
55  
56  
57  
58  
59  
60  
There is substantial literature investigating how vision impairment, and other aspects of function,  
affect road safety. Measures of driving safety have included indirect measures such as performance  
on driving simulators, on-road driving assessments, naturalistic driving or in-vehicle monitoring as  
well as direct measures of RTI and MVC rates from self-report or administrative datasets.(18, 19)  
However, the evidence for the influence of vision loss on MVCs and the corresponding benefits of  
interventions to restore vision have not been systematically evaluated. Since older drivers have  
higher crash involvement(20) and greater prevalence of eye diseases due to natural age-related  
declines in vision,(21) most research investigate older drivers and their risks of crashes and injuries.  
However, it is important to document the impact of vision impairment across all age groups.  
Further, information is also needed about specific eye diseases and types of vision impairment to  
inform interventions to screen for poor vision in drivers, and interventions to rehabilitate vision,  
thereby enhancing driver safety and continued ability to drive. This is especially important for older  
adults who rely on driving to remain independent and connected with their community. The loss of  
the ability to drive and the eventual retirement from driving has been linked to higher symptoms of  
depression and poorer health in older adults.(22)

The aim of this systematic review is to: 1) describe the associations between vision impairment and  
risk of road crash involvement across the lifespan, and 2) evaluate vision-related interventions to  
reduce crash risk. Secondary outcomes are driving cessation and surrogate measures of crash risk  
such as on-road driving errors.

## METHODS AND ANALYSIS

This systematic review protocol was drafted using the International Prospective Register of Systematic Reviews (PROSPERO) as a guideline and registered in PROSPERO (28/04/2020; CRD42020172153 [[https://www.crd.york.ac.uk/prospero/display\\_record.php?ID=CRD42020172153](https://www.crd.york.ac.uk/prospero/display_record.php?ID=CRD42020172153)]). Any changes to the protocol will be updated in PROSPERO. The protocol is prepared in accordance to the Preferred Reporting Items for Systematic review and Meta-Analysis Protocols (PRISMA-P) statement (Appendix no. 1).(23)

### Eligibility Criteria

This review will include human studies in the English language with full-text available. Unlike the two previous Cochrane reviews which only included RCTs, this review will consider both interventional (RCTs and quasi-experimental) and observational (cohort, cross-sectional, and case-control) studies. Systematic reviews will be included if meta-analysis was performed. For systematic reviews without meta-analysis, the reference list will be examined for potentially relevant articles, but the systematic review itself will not be included. All literature reviews, commentary articles, dissertations, abstracts, editorials, and conference presentations will be excluded.

All studies must report on at least one of the outcome variables, described in the following section, which include MVC involvement and surrogate measures of driving safety such as driving errors and performance scores and driving cessation. Studies investigating either self-regulatory behaviours, such as night driving avoidance and decreasing travel mileage, or self-reported measures of driving safety, will be excluded. To obtain data on driving scores and performance, studies using on-road driving tests, which include closed-circuit routes and those combining both closed and real-road driving tracks, and naturalistic driving with in-vehicle monitoring will be included. Even though closed-circuits may not reflect true on-road driving conditions, tests for common driving manoeuvres such as road signage recognition, hazard recognition and avoidance, reversing, and gap perception are able to be recreated on these routes.(24) Driving errors and driving performance scores on the on-road driving tests can come from fitted in-vehicle monitoring technologies or trained observers. Studies which used driving simulators will be excluded as these are laboratory studies with only indirect measures of driving performance. MVC involvement cannot be measured and real-life driving experiences, such as limited exposure to driving at night, in bad weather, or during rush hour, may not be reflected in a simulation.(25) Additionally, the validity of driving simulator results are highly dependent upon the type of simulation program used and what kind of driving manoeuvre is being investigated.(26) As this review is interested in the MVC involvement and

1  
2  
3 driving abilities of individuals who drive and their habitual vision, studies which simulate  
4 impairments in vision will also be excluded.  
5  
6

7 The population of focus will be drivers of four-wheeled motorised vehicles such as cars, buses, and  
8 trucks. Unlike the two Cochrane reviews mentioned above which only focused on older drivers, this  
9 review will include drivers of all ages. Studies of drivers who have specific medical conditions (e.g.  
10 dementia, epilepsy, stroke, and history of medical events such as syncope), or vision difficulties due  
11 to other medical factors (e.g. hemianopia caused by brain damage) will not be included. Similarly,  
12 articles where vision status is not reported will be excluded.  
13  
14  
15  
16

17  
18 Exposures in the included studies will encompass all types of vision impairment including visual  
19 acuity, contrast sensitivity, visual field loss as well as impairments associated with specific eye  
20 diseases including but not limited to glaucoma, cataracts, aged-related macular degeneration (AMD),  
21 diabetic retinopathy (DR), stereopsis disorders, and colour vision deficiencies. Vision impairments  
22 can be categorised by the specific eye diseases or by specific measures of vision which can negatively  
23 impact normal everyday functioning. Even though it is not necessary for all included studies to  
24 report on vision-related interventions, studies which do report on interventions can include  
25 procedures such as vision screening, refractive correction, cataract surgery or other measures to  
26 restore and improve vision of drivers in order to maintain driving participation, promote safe driving  
27 and reduce risk of crash involvement. The exposure comparators of included studies will be drivers  
28 who either do not have a vision impairment or have not received a vision-related intervention,  
29 within a timeframe chosen by the study in question.  
30  
31  
32  
33  
34  
35  
36  
37  
38

### 39 **Outcome Measures**

40 The primary outcome measure is MVC involvement including fatal MVC involvement. Data on crash  
41 involvement and its severity can either come from self-reported surveys or data linkage with  
42 government and/or hospital records. Data from self-reported surveys will ensure that MVCs which  
43 were not serious enough to warrant a police or hospital report will be also be included.  
44  
45  
46  
47

48 Driving cessation and surrogate measures of driving safety will be the secondary outcomes. The  
49 surrogate measures of driving safety can include scores of driving performance from on-road driving  
50 tests or 'naturalistic' in-vehicle monitoring looking at manoeuvres such as lane keeping, braking, and  
51 abundance of road signage like traffic lights, stop and give way signs. To account for differences in the  
52 criteria used by trained observers to evaluate the driving performance scores on on-road driving  
53 tests, a pass/fail threshold for driving performance scores specific to this review will be decided  
54 upon by all investigators in order to synthesise results.  
55  
56  
57  
58  
59  
60

## Search Strategy

Electronic database search will be conducted by the Cochrane Eyes and Vision Information Specialist (IG) on Medline (Ovid), EMBASE, and Global Health from their inception to March 2020. Appendices 2, 3, and 4 shows the search strategies for Medline, EMBASE, and Global Health, respectively. Additional potentially relevant studies will be sought by experts in the field by checking the reference lists and citations of included studies, and checking the reference list of narrative systematic reviews identified in the search.

## Data Collection and Analysis

### *Data Management and Selection*

Each title and abstract will be screened by two investigators independently (from HN, KR, JR, JZ, SM, JF, GFK) using Covidence systematic review management software (Veritas Health Innovation, Melbourne, Australia; available at <https://www.covidence.org/home>). Full-text review of potentially relevant articles will then be conducted by two investigators independently. Discrepancies will be discussed and resolved via consultation with a third investigator.

### *Data Extraction*

Data extraction will be completed independently by two investigators (from among the same seven investigators). Data from included studies will be extracted using adaptations of the Joanna Briggs Institute (JBI) template for systematic reviews and observational studies (including cohort, cross-sectional, and case-control studies).(27) Adapted Cochrane templates will be used to extract data from randomized controlled trials and quasi-experimental studies.(28)

### *Quality Assessment*

A quality assessment to determine an overall risk of bias will be carried out on all included studies independently by two investigators (from the seven investigators mentioned previously). Conflicts will be resolved by a third investigator. Relevant JBI critical appraisal tools will be used to evaluate randomised controlled trials, quasi-experimental studies, systematic reviews, cohort studies, cross-sectional studies, and case-control studies.(29)

### *Data Synthesis Strategy*

Measures of association between vision impairment/vision related interventions and MVC involvement, driving cessation and surrogate measures of driving safety will be summarized according to the outcome measures reported in the primary studies. In particular, appropriate hazard ratio (HR), risk ratio (RR), and odds ratio (OR) for binary data and (standardized) mean

1  
2  
3 differences for continuous data will be statistically pooled. When the same outcome is reported as  
4 dichotomous data in some studies and as continuous data in others, these studies will be pooled by  
5 expressing the ORs as standardized mean differences and vice versa.(30) P-values of the driving  
6 outcomes will also be reported where appropriate.  
7  
8  
9

10 Where it is not possible or suitable to statistically pool the studies, a narrative summary of the  
11 findings will be used instead. Narrative summaries will follow the Synthesis Without Meta-analysis  
12 (SWiM) reporting guidelines.(31) Heterogeneity across all included studies with sufficient data will  
13 be assessed clinically, methodologically and statistically. Clinical heterogeneity will be assessed by  
14 comparing the differences between the participant characteristics (e.g. age, sex, eye disease),  
15 interventions and outcomes measured. The design and quality of included studies will be compared  
16 to assess methodological heterogeneity. Statistical heterogeneity across studies will be explored by  
17 formal statistical test of heterogeneity, subgroup analyses and, if feasible, by meta-regression.  
18 Inconsistency of the effect sizes across the studies will be assessed by the proportion of variability in  
19 the effect sizes of the included studies due to heterogeneity (and not by sampling error) using  $I^2$ .  
20 Estimates will be pooled using random effects models with fixed effect models results also reported  
21 regardless of the values of  $I^2$ , and prediction intervals to allow for expected effects of future studies  
22 to be extrapolated based upon the current evidence.(32)  
23  
24  
25  
26  
27  
28  
29  
30  
31  
32

33 The following outcomes will be assessed using meta-analysis where feasible according to data  
34 availability: crash involvement, driving cessation, and surrogate measures of un-safe driving i.e.  
35 driving errors and driving performance. Furthermore meta-analyses for each of the different eye  
36 diseases, and studies from LMIC settings will also be performed independently for each outcome of  
37 interest if possible. As there is no age restriction on the focus population, results on age will be  
38 synthesised by assessing specific subgroup analysis and/or meta-regression which may partially  
39 explain heterogeneity across studies in the pooled effect size. The Meta-analysis of Observational  
40 Studies in Epidemiology (MOOSE) guidelines will be used to guide reporting.(33) The Grading of  
41 Recommendations Assessment, Development and Evaluation (GRADE) approach will be used to  
42 assess the quality of evidence in the meta-analyses.(34)  
43  
44  
45  
46  
47  
48  
49

50 Sensitivity analysis will be performed on low risk of bias studies whilst the meta-analysis will include  
51 all studies. This will assist with verifying the strength of the study findings and to assess how  
52 different methodologies, sample sizes and statistical analyses have affected this study's results.  
53 Furthermore, funnel plots will be used to assess publication bias.  
54  
55

56  
57 Corresponding authors from publications dated 2010 onwards with missing data of potential use will  
58 be approached via email, up to a maximum of 3 attempts, to request further information. Any  
59  
60

1  
2  
3 unobtainable data will be noted alongside all attempts to contact the respective authors. Even  
4 though only available data will be used for the meta-analysis, the effects of any missing data will be  
5 considered and their effects discussed in the overall final review.  
6  
7

### 8 **Patient and Public Involvement**

9  
10 This review will only be looking at existing published literature. No patient or public involvement is  
11 currently planned for the design and execution of this review, however public participation may be  
12 sought for this review's dissemination.  
13  
14

### 15 **ETHICS AND DISSEMINATION**

16  
17 As this review will only be focusing on currently published literature, ethics approval is not required.  
18 Results from this systematic review will be published in an open peer-reviewed journal and will form  
19 part of the ongoing *Lancet Global Health* Commission on Global Eye Health.(35) Where relevant, it  
20 will also be presented at conferences.  
21  
22  
23  
24

### 25 **DISCUSSION**

#### 26 **Significance of this review**

27  
28 The findings of this systematic review may influence future road safety policies on driving and care  
29 for drivers with vision impairment. By understanding the visual factors contributing to MVCs, ,  
30 vision-related screening tests for licencing may be reconsidered and updated to increase relevance  
31 to driving safety. As mentioned previously, most reviews on driving with vision impairment have  
32 been limited to older drivers and the effects of different licencing renewal procedures on their  
33 ability to drive. Even though older drivers are at higher risk,(21) this review will seek to capture data  
34 on driving and vision impairment for all age groups.  
35  
36  
37  
38  
39  
40  
41

42 The eligibility criteria for included studies for this review will ensure that global data on vision and  
43 driving will be captured. Currently, MVC-related societal burdens and injury- related disability  
44 burdens in LMICs are poorly understood which may partially explain why cost-effective interventions  
45 in these countries are rarely undertaken.(2) LMICs tend to focus on legislative interventions,  
46 followed by education/training workshops, public awareness campaigns, enforcement measures,  
47 speed control and infrastructure improvements.(36) Current data on human factors specifically  
48 related to vision impairment in LMICs reported in this review may inform future evidence-based  
49 policies on licencing and/or screening policies to address these gaps.  
50  
51  
52  
53  
54  
55

56 Results from this review may also provide additional evidence on the impact of eye-disease specific  
57 interventions on quality of life factors, especially those related to driving and the ability to drive.  
58 Interventions to improve and optimise vision are needed for drivers, in recognition of the important  
59  
60

1  
2  
3 of continued safe driving. This greater awareness in turn will also provide evidence for policies  
4 around road safety for individuals with vision impairments.  
5  
6  
7  
8  
9  
10  
11  
12  
13  
14  
15  
16  
17  
18  
19  
20  
21  
22  
23  
24  
25  
26  
27  
28  
29  
30  
31  
32  
33  
34  
35  
36  
37  
38  
39  
40  
41  
42  
43  
44  
45  
46  
47  
48  
49  
50  
51  
52  
53  
54  
55  
56  
57  
58  
59  
60

For peer review only

## REFERENCES

- 1 World Health Organisation. Road Traffic Injuries 2020; <https://www.who.int/news-room/fact-sheets/detail/road-traffic-injuries> (accessed April 2020)
- 2 Bachani AM, Peden M, Gururaj G, et al. Road Traffic Injuries. In: Mock CN, Nugent R, Kobusingye O, Smith KR, eds. Injury Prevention and Environmental Health. Washington (DC): The International Bank for Reconstruction and Development / The World Bank © 2017 International Bank for Reconstruction and Development / The World Bank.; 2017.
- 3 Chen S, Kuhn M, Prettner K, et al. The global macroeconomic burden of road injuries: estimates and projections for 166 countries. *Lancet Planet Health* 2019;3(9):e390-e8. doi: 10.1016/S2542-5196(19)30170-6
- 4 Wijnen W, Stipdonk H. Social costs of road crashes: An international analysis. *Accid Anal Prev* 2016;94:97-106. doi: 10.1016/j.aap.2016.05.005 [published Online First: 3 June 2016]
- 5 United Nations. #Envision2030: 17 goals to transform the world for persons with disabilities; <https://www.un.org/development/desa/disabilities/envision2030.html> (accessed April 2020)
- 6 Haddon W, Jr. Energy damage and the ten countermeasure strategies. *J Trauma* 1973;13(4):321-31. doi: 10.1177/001872087301500407
- 7 The Department of Infrastructure, Regional Development and Communications: Australian Government. Decade of Action for Road Safety 2011-2020 2014; [https://www.infrastructure.gov.au/roads/safety/decade\\_of\\_action/index.aspx](https://www.infrastructure.gov.au/roads/safety/decade_of_action/index.aspx) (accessed April 2020)
- 8 Towards Zero Foundation. The Safe System; <http://www.towardszerofoundation.org/thesafesystem/> (accessed 30 July 2020)
- 9 Global Road Safety Partnership. Bloomberg Initiative for Global Road Safety; <https://www.grsproadsafety.org/programmes/bloomberg-initiative-global-road-safety/> (accessed April 2020)
- 10 Miller SM, Taylor-Piliae RE, Insel KC. The association of physical activity, cognitive processes and automobile driving ability in older adults: A review of the literature. *Geriatr Nurs* 2016;37(4):313-20. doi: 10.1016/j.gerinurse.2016.05.004 [published Online First: 31 May 2016]
- 11 Rubin GS, Ng ES, Bandeen-Roche K, et al. A prospective, population-based study of the role of visual impairment in motor vehicle crashes among older drivers: the SEE study. *Invest Ophthalmol Vis Sci* 2007;48(4):1483-91. doi: 10.1167/iovs.06-0474
- 12 Dobbs BM. Aging baby boomers--a blessing or challenge for driver licensing authorities. *Traffic Inj Prev* 2008;9(4):379-86. doi: 10.1080/15389580802045823
- 13 Desapriya E, Harjee R, Brubacher J, et al. Vision screening of older drivers for preventing road traffic injuries and fatalities. *Cochrane Database Syst Rev* 2014(2):Cd006252. doi: 10.1002/14651858.CD006252.pub3



- 1  
2  
3 14 Grabowski DC, Campbell CM, Morrisey MA. Elderly licensure laws and motor vehicle  
4 fatalities. *JAMA* 2004;291(23):2840-6. doi: 10.1001/jama.291.23.2840  
5  
6 15 Levy DT, Vernick JS, Howard KA. Relationship between driver's license renewal policies and  
7 fatal crashes involving drivers 70 years or older. *JAMA* 1995;274(13):1026-30. doi:  
8 0.1001/jama.1995.03530130032024  
9  
10 16 Owsley C, McGwin G, Jr. Vision impairment and driving. *Surv Ophthalmol* 1999;43(6):535-50.  
11  
12 17 Subzwari S, Desapriya E, Babul-Wellar S, et al. Vision screening of older drivers for  
13 preventing road traffic injuries and fatalities. *Cochrane Database Syst Rev* 2009(1):Cd006252. doi:  
14 10.1002/14651858.CD006252.pub2  
15  
16 18 Imprialou M, Quddus M. Crash data quality for road safety research: Current state and  
17 future directions. *Accid Anal Prev* 2019;130:84-90. doi: 10.1016/j.aap.2017.02.022  
18  
19 19 Kaye SA, Lewis I, Freeman J. Comparison of self-report and objective measures of driving  
20 behavior and road safety: A systematic review. *J Safety Res* 2018;65:141-51. doi:  
21 10.1016/j.jsr.2018.02.012  
22  
23 20 Owsley C, Ball K, Sloane ME, et al. Visual/cognitive correlates of vehicle accidents in older  
24 drivers. *Psychol Aging* 1991;6(3):403-15. doi: 10.1037//0882-7974.6.3.403  
25  
26 21 Wood JM, Black AA. Ocular disease and driving. *Clin Exp Optom*. 2016;99(5):395-401. doi:  
27 10.1111/cxo.12391 [published Online First: 7 May 2016]  
28  
29 22 Ragland DR, Satariano WA, MacLeod KE. Driving cessation and increased depressive  
30 symptoms. *J Gerontol A Biol Sci Med Sci* 2005;60(3):399-403. doi: 10.1093/gerona/60.3.399  
31  
32 23 Shamseer L, Moher D, Clarke M, et al. Preferred reporting items for systematic review and  
33 meta-analysis protocols (PRISMA-P) 2015: elaboration and explanation. *BMJ* 2015;350:g7647. doi:  
34 10.1136/bmj.g7647  
35  
36 24 Wood JM. Age and visual impairment decrease driving performance as measured on a  
37 closed-road circuit. *Hum factors*. 2002;44(3):482-94. doi: 10.1518/0018720024497664  
38  
39 25 Keay L, West SK. Vision and Driving Performance in Elderly. In: Scholl HPN, Massof RW, West  
40 SK eds. *Ophthalmology and the Ageing Society*. Berlin Heidelberg: Springer-Verlag 2013:193-207.  
41  
42 26 Shechtman O, Classen S, Awadzi K, et al. Comparison of driving errors between on-the-road  
43 and simulated driving assessment: a validation study. *Traffic Inj Prev* 2009;10(4):379-85. doi:  
44 10.1080/15389580902894989  
45  
46 27 The Joanna Briggs Institute. Joanna Briggs Institute Reviewer's Manual. 2017. Available from:  
47 <https://reviewersmanual.joannabriggs.org/> (accessed April 2020)  
48  
49 28 Cochrane: Developmental PaLP. Data Extraction Forms 2014 [Available from:  
50 <https://dplp.cochrane.org/data-extraction-forms> (accessed April 2020).  
51  
52 29 University of Adelaide. Critical Appraisal Tools;  
53 [https://joannabriggs.org/ebp/critical\\_appraisal\\_tools](https://joannabriggs.org/ebp/critical_appraisal_tools) (assessed April 2020)  
54  
55  
56  
57  
58  
59  
60

- 1  
2  
3 30 Anzures-Cabrera J, Sarpatwari A, Higgins JP. Expressing findings from meta-analyses of  
4 continuous outcomes in terms of risks. *Stat Med* 2011;30(25):2967-85. doi: 10.1002/sim.4298  
5 [published Online First: 8 August 2011]  
6  
7  
8 31 Campbell M, McKenzie JE, Sowden A, et al. Synthesis without meta-analysis (SWiM) in  
9 systematic reviews: reporting guideline. *BMJ* 2020;368:l6890. doi: 10.1136/bmj.l6890  
10  
11 32 IntHout J, Ioannidis JP, Rovers MM, et al. Plea for routinely presenting prediction intervals in  
12 meta-analysis. *BMJ Open* 2016;6(7):e010247. doi: 10.1136/bmjopen-2015-010247  
13  
14 33 Stroup DF, Berlin JA, Morton SC, et al. Meta-analysis of observational studies in  
15 epidemiology: a proposal for reporting. Meta-analysis Of Observational Studies in Epidemiology  
16 (MOOSE) group. *JAMA* 2000;283(15):2008-12. doi: 10.1001/jama.283.15.2008  
17  
18 34 Iorio A, Spencer FA, Falavigna M, et al. Use of GRADE for assessment of evidence about  
19 prognosis: rating confidence in estimates of event rates in broad categories of patients. *BMJ*  
20 2015;350:h870. doi: 10.1136/bmj.h870  
21  
22 35 Burton MJ, Faal HB, Ramke J, et al. Announcing The Lancet Global Health Commission on  
23 Global Eye Health. *Lancet Glob Health* 2019;7(12):e1612-e3. doi: 10.1016/S2214-109X(19)30450-4  
24 [published Online First: 9 October 2019]  
25  
26 36 Staton C, Vissoci J, Gong E, et al. Road Traffic Injury Prevention Initiatives: A Systematic  
27 Review and Metasummary of Effectiveness in Low and Middle Income Countries. *PloS One*  
28 2016;11(1):e0144971. doi: 10.1371/journal.pone.0144971  
29  
30  
31  
32  
33  
34  
35  
36  
37  
38  
39  
40  
41  
42  
43  
44  
45  
46  
47  
48  
49  
50  
51  
52  
53  
54  
55  
56  
57  
58  
59  
60

1  
2  
3 **Authors' Contributions:** HN, LK, and JR conceived the idea for the review. HN drafted and revised  
4 the protocol with suggestions from LK, JR, JB, KC, GLdT, KR, MJB, JZ, IG, JFM, SM, and GFK who  
5 reviewed the protocol and provided feedback on the draft. IG constructed the search. The final  
6 version of the manuscript was approved by all authors.  
7

8  
9 **Funding Statement:** MJB is supported by the Wellcome Trust (207472/Z/17/Z). JR is a Commonwealth  
10 Rutherford Fellow, funded by the UK government through the Commonwealth Scholarship  
11 Commission in the UK. The Lancet Global Health Commission on Global Eye Health is supported by  
12 The Queen Elizabeth Diamond Jubilee Trust, The Wellcome Trust, Sightsavers, The Fred Hollows  
13 Foundation, The SEVA Foundation, The British Council for the Prevention of Blindness and Christian  
14 Blind Mission.  
15  
16  
17  
18

19 **Acknowledgements:** None.  
20

21 **Competing Interests:** None declared.  
22

23 **Number of Tables:** 0  
24

25 **Number of Figures:** 0  
26  
27

28 **Data Sharing Statement:** Data generated from this review will be available upon reasonable  
29 request from HN.  
30  
31

32 **Word Count:** 3349  
33  
34  
35  
36  
37  
38  
39  
40  
41  
42  
43  
44  
45  
46  
47  
48  
49  
50  
51  
52  
53  
54  
55  
56  
57  
58  
59  
60

### Appendix 1. Preferred Reporting Items for Systematic review and Meta-analysis Protocols (PRISMA-P) 2015 Checklist

| Section and topic                 | Item No | Checklist item                                                                                                                                                                                                                | Page Number |
|-----------------------------------|---------|-------------------------------------------------------------------------------------------------------------------------------------------------------------------------------------------------------------------------------|-------------|
| <b>ADMINISTRATIVE INFORMATION</b> |         |                                                                                                                                                                                                                               |             |
| Title:                            |         |                                                                                                                                                                                                                               |             |
| Identification                    | 1a      | Identify the report as a protocol of a systematic review                                                                                                                                                                      | 1           |
| Update                            | 1b      | If the protocol is for an update of a previous systematic review, identify as such                                                                                                                                            | N/A         |
| Registration                      | 2       | If registered, provide the name of the registry (such as PROSPERO) and registration number                                                                                                                                    | 2, 6        |
| Authors:                          |         |                                                                                                                                                                                                                               |             |
| Contact                           | 3a      | Provide name, institutional affiliation, e-mail address of all protocol authors; provide physical mailing address of corresponding author                                                                                     | 1           |
| Contributions                     | 3b      | Describe contributions of protocol authors and identify the guarantor of the review                                                                                                                                           | 8, 15       |
| Amendments                        | 4       | If the protocol represents an amendment of a previously completed or published protocol, identify as such and list changes; otherwise, state plan for documenting important protocol amendments                               | N/A         |
| Support:                          |         |                                                                                                                                                                                                                               |             |
| Sources                           | 5a      | Indicate sources of financial or other support for the review                                                                                                                                                                 | 15          |
| Sponsor                           | 5b      | Provide name for the review funder and/or sponsor                                                                                                                                                                             | 15          |
| Role of sponsor or funder         | 5c      | Describe roles of funder(s), sponsor(s), and/or institution(s), if any, in developing the protocol                                                                                                                            | 15          |
| <b>INTRODUCTION</b>               |         |                                                                                                                                                                                                                               |             |
| Rationale                         | 6       | Describe the rationale for the review in the context of what is already known                                                                                                                                                 | 4, 5        |
| Objectives                        | 7       | Provide an explicit statement of the question(s) the review will address with reference to participants, interventions, comparators, and outcomes (PICO)                                                                      | 5           |
| <b>METHODS</b>                    |         |                                                                                                                                                                                                                               |             |
| Eligibility criteria              | 8       | Specify the study characteristics (such as PICO, study design, setting, time frame) and report characteristics (such as years considered, language, publication status) to be used as criteria for eligibility for the review | 6, 7        |
| Information sources               | 9       | Describe all intended information sources (such as electronic databases, contact with study authors, trial registers or other grey literature sources) with planned dates of coverage                                         | 6, 8        |

|                                    |     |                                                                                                                                                                                                                                                  |                  |
|------------------------------------|-----|--------------------------------------------------------------------------------------------------------------------------------------------------------------------------------------------------------------------------------------------------|------------------|
| Search strategy                    | 10  | Present draft of search strategy to be used for at least one electronic database, including planned limits, such that it could be repeated                                                                                                       | Appendix no. 2-4 |
| Study records:                     |     |                                                                                                                                                                                                                                                  |                  |
| Data management                    | 11a | Describe the mechanism(s) that will be used to manage records and data throughout the review                                                                                                                                                     | 8                |
| Selection process                  | 11b | State the process that will be used for selecting studies (such as two independent reviewers) through each phase of the review (that is, screening, eligibility and inclusion in meta-analysis)                                                  | 8                |
| Data collection process            | 11c | Describe planned method of extracting data from reports (such as piloting forms, done independently, in duplicate), any processes for obtaining and confirming data from investigators                                                           | 8                |
| Data items                         | 12  | List and define all variables for which data will be sought (such as PICO items, funding sources), any pre-planned data assumptions and simplifications                                                                                          | 6, 7, 8          |
| Outcomes and prioritization        | 13  | List and define all outcomes for which data will be sought, including prioritization of main and additional outcomes, with rationale                                                                                                             | 7                |
| Risk of bias in individual studies | 14  | Describe anticipated methods for assessing risk of bias of individual studies, including whether this will be done at the outcome or study level, or both; state how this information will be used in data synthesis                             | 8, 9             |
| Data synthesis                     | 15a | Describe criteria under which study data will be quantitatively synthesised                                                                                                                                                                      | 8, 9             |
|                                    | 15b | If data are appropriate for quantitative synthesis, describe planned summary measures, methods of handling data and methods of combining data from studies, including any planned exploration of consistency (such as $I^2$ , Kendall's $\tau$ ) | 8, 9             |
|                                    | 15c | Describe any proposed additional analyses (such as sensitivity or subgroup analyses, meta-regression)                                                                                                                                            | 8, 9             |
|                                    | 15d | If quantitative synthesis is not appropriate, describe the type of summary planned                                                                                                                                                               | 2, 9             |
| Meta-bias(es)                      | 16  | Specify any planned assessment of meta-bias(es) (such as publication bias across studies, selective reporting within studies)                                                                                                                    | 8, 9             |
| Confidence in cumulative evidence  | 17  | Describe how the strength of the body of evidence will be assessed (such as GRADE)                                                                                                                                                               | 9                |

## Appendix 2. MEDLINE (OVID) search strategy

1. exp Eye Diseases/
2. exp Cataract Extraction/
3. Lens Implantation, Intraocular/
4. Lenses, Intraocular/
5. cataract\$.tw.
6. ((intraocular or intra ocular) adj3 lens\$).tw.
7. (IOL or IOLs).tw.
8. Vision Tests/
9. Visual Acuity/
10. exp Refractive Errors/
11. Visual Fields/
12. Visual Field Tests/
13. Contrast Sensitivity/
14. Depth Perception/
15. (visual adj2 (acuit\$ or field\$)).tw.
16. contrast sensitivity.tw.
17. (depth perception or stereopsis).tw.
18. ((impair\$ or decreas\$ or declin\$) adj3 (vision or visual\$ or sight\$)).tw.
19. (improv\$ adj3 (vision or visual\$ or sight\$)).tw.
20. ((visual or vision) adj2 function\$).tw.
21. exp Vision, Ocular/
22. Vision Screening/
23. or/1-22
24. Mass Screening/
25. ((eye\$ or sight or vision or visual\$) adj2 (test\$ or screen\$ or exam\$ or diagnos\$ or assess\$)).tw.
26. 24 and 25
27. 23 or 26
28. exp Motor Vehicles/
29. exp Automobile Driving/
30. Accidents, Traffic/
31. (driver\$ or driving).tw.
32. (automobile\$ or car or cars or vehicle\$).tw.
33. (motoring or motorcar or "motor car" or "motor cars").tw.
34. crash\$.tw.
35. ((road or traffic) adj2 injur\$).tw.
36. ((road or traffic or motor) adj2 (accident\$ or incident\$)).tw.
37. ((road or traffic or motor) adj2 collision\$).tw.
38. or/28-37
39. epidemiologic studies/ or case-control studies/ or cohort studies/ or observational study/ or follow-up studies/ or longitudinal studies/ or prospective studies/ or retrospective studies/ or controlled before-after studies/ or cross-sectional studies/ or historically controlled study/ or interrupted time series analysis/
40. epidemiologic methods/ or focus groups/ or interviews as topic/ or exp "surveys and questionnaires"/
41. epidemiologic research design/ or control groups/ or cross-over studies/ or double-blind method/ or meta-analysis as topic/ or network meta-analysis/ or random allocation/ or single-blind method/
42. epidemiologic methods/ or clinical trials as topic/ or feasibility studies/ or multicenter studies as topic/ or pilot projects/ or sampling studies/ or twin studies as topic/

- 1
- 2
- 3 43. randomized controlled trial/ or controlled clinical trials as topic/ or randomized controlled trials
- 4 as topic/
- 5 44. comparative study/ or evaluation studies/ or meta-analysis/ or review/ or multicenter study/ or
- 6 "systematic review"/ or validation studies/
- 7 45. health surveys/
- 8 46. outcome assessment, health care/
- 9 47. risk factors/
- 10 48. self report/
- 11 49. (population or cohort or observation\$ or intervention\$ or prospective or retrospective or
- 12 comparative).tw.
- 13 50. (questionnaire\$ or survey\$).tw.
- 14 51. (randomized or randomised or randomly or RCT).tw.
- 15 52. (systematic review or meta-analysis).tw.
- 16 53. (before adj2 after).tw.
- 17 54. (case\$ adj2 control\$).tw.
- 18 55. (cross adj1 section\$).tw.
- 19 56. or/39-55
- 20 57. 27 and 38
- 21 58. 56 and 57
- 22 59. vehicle-controlled.tw.
- 23 60. (vehicle adj3 inject\$).tw.
- 24 61. 59 or 60
- 25 62. 58 not 61
- 26 63. (animal\$ or mouse or mice\$ or dog or canine or rat or rats or primate\$).ti.
- 27 64. (dry eye or cell\$ or mutation\$ or genes or genome or sequencing).ti.
- 28 65. or/63-64
- 29 66. 62 not 65
- 30 67. limit 66 to english language
- 31 68. exp case reports/
- 32 69. (case adj2 report\$).tw.
- 33 70. 68 or 69
- 34 71. 67 not 70
- 35 72. limit 71 to (editorial or letter)
- 36 73. 71 not 72
- 37
- 38
- 39
- 40
- 41
- 42
- 43
- 44
- 45
- 46
- 47
- 48
- 49
- 50
- 51
- 52
- 53
- 54
- 55
- 56
- 57
- 58
- 59
- 60

### Appendix 3. EMBASE Search Strategy

1. exp eye disease/
2. exp cataract extraction/
3. lens implantation/
4. lens implant/
5. cataract\$.tw.
6. ((intraocular or intra ocular) adj3 lens\$).tw.
7. (IOL or IOLs).tw.
8. vision test/
9. visual acuity/
10. refractive error/
11. visual field/
12. perimetry/
13. contrast sensitivity/
14. depth perception/
15. (visual adj2 (acuit\$ or field\$)).tw.
16. contrast sensitivity.tw.
17. (depth perception or stereopsis).tw.
18. ((impair\$ or decreas\$ or declin\$) adj3 (vision or visual\$ or sight\$)).tw.
19. (improv\$ adj3 (vision or visual\$ or sight\$)).tw.
20. ((visual or vision) adj2 function\$).tw.
21. vision/
22. or/1-21
23. mass screening/
24. ((eye\$ or sight or vision or visual\$) adj2 (test\$ or screen\$ or exam\$ or diagnos\$ or assess\$)).tw.
25. 23 and 24
26. 22 or 25
27. exp car driving/
28. exp motor vehicle/
29. traffic accident/
30. (driver\$ or driving).tw.
31. (automobile\$ or car or cars or vehicle\$).tw.
32. (motoring or motorcar or "motor car" or "motor cars").tw.
33. crash\$.tw.
34. ((road or traffic) adj2 injur\$).tw.
35. ((road or traffic or motor) adj2 (accident\$ or incident\$)).tw.
36. ((road or traffic or motor) adj2 collision\$).tw.
37. or/27-36
38. study design/
39. controlled clinical trial/
40. case control study/
41. cohort analysis/
42. observational study/
43. follow up/
44. longitudinal study/
45. prospective study/
46. retrospective study/
47. epidemiology/
48. cross-sectional study/
49. control group/



- 1
- 2
- 3
- 4 50. crossover procedure/
- 5 51. "meta analysis (topic)"/
- 6 52. network meta-analysis/
- 7 53. randomization/
- 8 54. single blind procedure/
- 9 55. double blind procedure/
- 10 56. "clinical trial (topic)"/
- 11 57. "controlled clinical trial (topic)"/
- 12 58. "randomized controlled trial (topic)"/
- 13 59. "multicenter study (topic)"/
- 14 60. feasibility study/
- 15 61. pilot study/
- 16 62. comparative study/
- 17 63. evaluation study/
- 18 64. multicenter study/
- 19 65. randomized controlled trial/
- 20 66. meta analysis/
- 21 67. "systematic review"/
- 22 68. validation study/
- 23 69. interview/
- 24 70. questionnaire/
- 25 71. outcome assessment/
- 26 72. "systematic review (topic)"/
- 27 73. health survey/
- 28 74. risk factor/
- 29 75. self report/
- 30 76. evidence based practice/
- 31 77. (population or cohort or observation\$ or intervention\$ or prospective or retrospective or
- 32 comparative).tw.
- 33 78. (questionnaire\$ or survey\$).tw.
- 34 79. (randomized or randomised or randomly or RCT).tw.
- 35 80. (systematic review or meta-analysis).tw.
- 36 81. (before adj2 after).tw.
- 37 82. (case\$ adj2 control\$).tw.
- 38 83. (cross adj1 section\$).tw.
- 39 84. or/38-83
- 40 85. 26 and 37
- 41 86. 84 and 85
- 42 87. vehicle-controlled.tw.
- 43 88. (vehicle adj3 inject\$).tw.
- 44 89. or/87-88
- 45 90. 86 not 89
- 46 91. (animal\$ or mouse or mice\$ or dog or canine or rat or rats or primate\$).ti.
- 47 92. (dry eye or cell\$ or mutation\$ or genes or genome or sequencing).ti.
- 48 93. or/91-92
- 49 94. 90 not 93
- 50 95. limit 94 to conference abstract status
- 51 96. 94 not 95
- 52 97. limit 96 to english language
- 53 98. exp case report/
- 54 99. (case adj2 report\$).tw.
- 55
- 56
- 57
- 58
- 59
- 60

1  
2  
3  
4  
5  
6  
7  
8  
9  
10  
11  
12  
13  
14  
15  
16  
17  
18  
19  
20  
21  
22  
23  
24  
25  
26  
27  
28  
29  
30  
31  
32  
33  
34  
35  
36  
37  
38  
39  
40  
41  
42  
43  
44  
45  
46  
47  
48  
49  
50  
51  
52  
53  
54  
55  
56  
57  
58  
59  
60

- 100. or/98-99
- 101. 97 not 100
- 102. limit 101 to (conference paper or "conference review" or editorial or letter or note)
- 103. 101 not 102

For peer review only

#### Appendix 4. GLOBAL HEALTH Search Strategy

1. exp eye diseases/
2. exp vision disorders/
3. cataract\$.tw.
4. ((intraocular or intra ocular) adj3 lens\$).tw.
5. (IOL or IOLs).tw.
6. (visual adj2 (acuit\$ or field\$)).tw.
7. contrast sensitivity.tw.
8. (depth perception or stereopsis).tw.
9. ((impair\$ or decreas\$ or declin\$) adj3 (vision or visual\$ or sight\$)).tw.
10. (improv\$ adj3 (vision or visual\$ or sight\$)).tw.
11. ((visual or vision) adj2 function\$).tw.
12. ((eye\$ or sight or vision or visual\$) adj2 (test\$ or screen\$ or exam\$ or diagnos\$ or assess\$)).tw.
13. or/1-12
14. drivers/
15. vehicles/
16. motor cars/
17. traffic/
18. traffic accidents/
19. (driver\$ or driving).tw.
20. (automobile\$ or car or cars or vehicle\$).tw.
21. (motoring or motorcar or "motor car" or "motor cars").tw.
22. crash\$.tw.
23. ((road or traffic) adj2 injur\$).tw.
24. ((road or traffic or motor) adj2 (accident\$ or incident\$)).tw.
25. ((road or traffic or motor) adj2 collision\$).tw.
26. or/14-25
27. cohort studies/
28. case-control studies/
29. longitudinal studies/
30. retrospective studies/
31. epidemiology/
32. exp clinical trials/
33. randomized controlled trials/
34. feasibility studies/
35. pilot projects/
36. meta-analysis/
37. systematic reviews/
38. reviews/
39. questionnaires/
40. surveys/
41. epidemiological surveys/
42. risk factors/
43. (population or cohort or observation\$ or intervention\$ or prospective or retrospective or comparative).tw.
44. (questionnaire\$ or survey\$).tw.
45. (randomized or randomised or randomly or RCT).tw.
46. (systematic review or meta-analysis).tw.
47. (before adj2 after).tw.
48. (case\$ adj2 control\$).tw.

1  
2  
3  
4  
5  
6  
7  
8  
9  
10  
11  
12  
13  
14  
15  
16  
17  
18  
19  
20  
21  
22  
23  
24  
25  
26  
27  
28  
29  
30  
31  
32  
33  
34  
35  
36  
37  
38  
39  
40  
41  
42  
43  
44  
45  
46  
47  
48  
49  
50  
51  
52  
53  
54  
55  
56  
57  
58  
59  
60

49. (cross adj1 section\$.tw.
50. or/27-49
51. 13 and 26
52. 50 and 51
53. (animal\$ or mouse or mice\$ or dog or canine or rat or rats or primate\$.ti.
54. (dry eye or cell\$ or mutation\$ or genes or genome or sequencing).ti.
55. 53 or 54
56. 52 not 55
57. limit 56 to english language
58. case reports/
59. (case adj2 report\$.tw.
60. 58 or 59
61. 57 not 60
62. limit 61 to (conference or conference paper or conference proceedings or correspondence or editorial or thesis)
63. 61 not 62

# BMJ Open

## Associations between vision impairment and driving and the effectiveness of vision-related interventions: protocol for a systematic review and meta-analysis

|                                 |                                                                                                                                                                                                                                                                                                                                                                                                                                                                                                                                                                                                                                                                                                                                                                                                                                                                                                                                                                                                                                                                                                                                                                                                                                                                                         |
|---------------------------------|-----------------------------------------------------------------------------------------------------------------------------------------------------------------------------------------------------------------------------------------------------------------------------------------------------------------------------------------------------------------------------------------------------------------------------------------------------------------------------------------------------------------------------------------------------------------------------------------------------------------------------------------------------------------------------------------------------------------------------------------------------------------------------------------------------------------------------------------------------------------------------------------------------------------------------------------------------------------------------------------------------------------------------------------------------------------------------------------------------------------------------------------------------------------------------------------------------------------------------------------------------------------------------------------|
| Journal:                        | <i>BMJ Open</i>                                                                                                                                                                                                                                                                                                                                                                                                                                                                                                                                                                                                                                                                                                                                                                                                                                                                                                                                                                                                                                                                                                                                                                                                                                                                         |
| Manuscript ID                   | bmjopen-2020-040881.R2                                                                                                                                                                                                                                                                                                                                                                                                                                                                                                                                                                                                                                                                                                                                                                                                                                                                                                                                                                                                                                                                                                                                                                                                                                                                  |
| Article Type:                   | Protocol                                                                                                                                                                                                                                                                                                                                                                                                                                                                                                                                                                                                                                                                                                                                                                                                                                                                                                                                                                                                                                                                                                                                                                                                                                                                                |
| Date Submitted by the Author:   | 28-Sep-2020                                                                                                                                                                                                                                                                                                                                                                                                                                                                                                                                                                                                                                                                                                                                                                                                                                                                                                                                                                                                                                                                                                                                                                                                                                                                             |
| Complete List of Authors:       | <p>Nguyen, Helen; University of New South Wales<br/>           Di Tanna, Gian Luca; George Institute for Global Health,<br/>           Coxon, Kristy; Western Sydney University, School of Health Sciences<br/>           Brown, Julie; George Institute for Global Health, Injury<br/>           Ren, Kerrie; University of New South Wales<br/>           Ramke, Jacqueline; LSHTM,<br/>           Burton, Matthew J; London School of Hygiene and Tropical Medicine<br/>           Gordon, Iris<br/>           Zhang, Justine; London School of Hygiene and Tropical Medicine Faculty<br/>           of Infectious and Tropical Diseases, International Centre for Eye Health,<br/>           Clinical Research Department<br/>           Furtado, João; Universidade de São Paulo Faculdade de Medicina de<br/>           Ribeirão Preto, Division of Ophthalmology<br/>           Mdala, Shaffi; Queen Elizabeth Central Hospital, Ophthalmology<br/>           Department<br/>           Kitema, Gatera Fiston; University of Rwanda College of Medicine and<br/>           Health Sciences, Ophthalmology Department<br/>           Keay, Lisa; University of New South Wales, School of Optometry and<br/>           Vision Science; The George Institute for Global Health</p> |
| <b>Primary Subject Heading</b>: | Ophthalmology                                                                                                                                                                                                                                                                                                                                                                                                                                                                                                                                                                                                                                                                                                                                                                                                                                                                                                                                                                                                                                                                                                                                                                                                                                                                           |
| Secondary Subject Heading:      | Public health                                                                                                                                                                                                                                                                                                                                                                                                                                                                                                                                                                                                                                                                                                                                                                                                                                                                                                                                                                                                                                                                                                                                                                                                                                                                           |
| Keywords:                       | PUBLIC HEALTH, OPHTHALMOLOGY, EPIDEMIOLOGY                                                                                                                                                                                                                                                                                                                                                                                                                                                                                                                                                                                                                                                                                                                                                                                                                                                                                                                                                                                                                                                                                                                                                                                                                                              |
|                                 |                                                                                                                                                                                                                                                                                                                                                                                                                                                                                                                                                                                                                                                                                                                                                                                                                                                                                                                                                                                                                                                                                                                                                                                                                                                                                         |

SCHOLARONE™  
Manuscripts



I, the Submitting Author has the right to grant and does grant on behalf of all authors of the Work (as defined in the below author licence), an exclusive licence and/or a non-exclusive licence for contributions from authors who are: i) UK Crown employees; ii) where BMJ has agreed a CC-BY licence shall apply, and/or iii) in accordance with the terms applicable for US Federal Government officers or employees acting as part of their official duties; on a worldwide, perpetual, irrevocable, royalty-free basis to BMJ Publishing Group Ltd ("BMJ") its licensees and where the relevant Journal is co-owned by BMJ to the co-owners of the Journal, to publish the Work in this journal and any other BMJ products and to exploit all rights, as set out in our [licence](#).

The Submitting Author accepts and understands that any supply made under these terms is made by BMJ to the Submitting Author unless you are acting as an employee on behalf of your employer or a postgraduate student of an affiliated institution which is paying any applicable article publishing charge ("APC") for Open Access articles. Where the Submitting Author wishes to make the Work available on an Open Access basis (and intends to pay the relevant APC), the terms of reuse of such Open Access shall be governed by a Creative Commons licence – details of these licences and which [Creative Commons](#) licence will apply to this Work are set out in our licence referred to above.

Other than as permitted in any relevant BMJ Author's Self Archiving Policies, I confirm this Work has not been accepted for publication elsewhere, is not being considered for publication elsewhere and does not duplicate material already published. I confirm all authors consent to publication of this Work and authorise the granting of this licence.

# Associations between vision impairment and driving and the effectiveness of vision-related interventions: protocol for a systematic review and meta-analysis

**Authors:** Helen Nguyen<sup>1</sup>, Gian Luca Di Tanna<sup>2</sup>, Kristy Coxon<sup>3</sup>, Julie Brown<sup>2</sup>, Kerrie Ren<sup>1</sup>, Jacqueline Ramke<sup>4,5</sup>, Matthew J Burton<sup>4,6</sup>, Iris Gordon<sup>4</sup>, Justine H Zhang<sup>4,7</sup>, João M. Furtado<sup>8</sup>, Shaffi Mdala<sup>9</sup>, Gatera Fiston Kitema<sup>10</sup>, Lisa Keay<sup>1,2</sup>

## **Affiliations:**

- 1 School of Optometry and Vision Science, Faculty of Science, The University of New South Wales, NSW, Australia
- 2 The George Institute for Global Health, Faculty of Medicine, University of New South Wales, NSW, Australia
- 3 School of Health Sciences, and the Translational Health Research Institute, Western Sydney University, NSW, Australia
- 4 International Centre for Eye Health, London School of Hygiene & Tropical Medicine, London, United Kingdom, WC1 E7HT
- 5 School of Optometry and Vision Science, University of Auckland, Auckland, New Zealand
- 6 Moorfields Eye Hospital, London, UK
- 7 Manchester Royal Eye Hospital, Manchester, United Kingdom
- 8 Division of Ophthalmology, Ribeirão Preto Medical School, University of São Paulo, Ribeirão Preto, São Paulo, Brazil
- 9 Ophthalmology Department, Queen Elizabeth Central Hospital, Blantyre, Malawi
- 10 Ophthalmology Department, School of Health Sciences, University of Rwanda, Kigali, Rwanda

**Corresponding Author:** Lisa Keay

Postal Address: School of Optometry and Vision Science, The University of New South Wales, Sydney UNSW NSW 2052, Australia

Email: [l.keay@unsw.edu.au](mailto:l.keay@unsw.edu.au)

**Keywords:** visual impairment, road traffic injuries, motor vehicle crashes, driving cessation, driving errors, driving performance, fatal crash involvement

**ABSTRACT**

**Introduction:** Driving is one of the main modes of transport with safe driving requiring a combination of visual, cognitive, and physical skills. With population ageing, the number of people living with vision impairment is set to increase in the decades ahead. Vision impairment may negatively impact an individual's ability to safely drive. The association between vision impairment and motor vehicle crash involvement or driving participation has yet to be systematically investigated. Further, the evidence for the effectiveness of vision-related interventions aimed at decreasing crashes and driving errors has not been synthesised.

**Methods and Analysis:** A search will be conducted for relevant studies on Medline (Ovid), EMBASE, and Global Health from their inception to March 2020 without date or geographical restrictions. Two investigators will independently screen abstracts and full-texts using Covidence software with conflicts resolved by a third investigator. Data extraction will be conducted on all included studies, and their quality assessed to determine risk of bias using the Joanna Briggs Institute (JBI) Critical Appraisal Tools. Outcome measures include crash risk, driving cessation, and surrogate measures of driving safety (e.g. driving errors and performance). The results of this review will be reported using the Preferred Reporting Items for Systematic Review and Meta-Analysis (PRISMA) guideline. Meta-analysis will be undertaken for outcomes with sufficient data and reported following the Meta-analyses of Observational Studies in Epidemiology (MOOSE) guideline. Where statistical pooling is not feasible or appropriate, narrative summaries will be presented following the Synthesis Without Meta-analysis (SWiM) in systematic reviews guideline.

**Ethics and dissemination:** This review will only report on published data thus no ethics approval is required. Results will be included in the *Lancet Global Health* Commission on Global Eye Health, published in a peer-reviewed journal, and presented at relevant conferences.

**PROSPERO registration number:** CRD42020172153



### STRENGTHS AND LIMITATIONS OF THIS STUDY

- Results from this systematic review will present up-to-date evidence for the influence of vision impairment on road traffic injuries (RTIs) and the effectiveness of vision-related interventions.
- As there are no geographic restrictions in the criteria for included studies, this review will capture a large portion of English-language publications in this research area with findings applicable to a global context.
- This review will not restrict the age of the target population allowing evidence on the impact of vision impairment and driving to be documented for all age groups.
- This review only looks at published studies in English, so research from non-English speaking countries will be missed, which could introduce bias
- Another potential limitation is that interventions and outcome measures may be highly heterogeneous which will affect the conclusions drawn from the results and prevent meta-analyses to be conducted for select outcomes.

## INTRODUCTION

According to the World Health Organisation (WHO),(1) approximately 1.35 million people die each year from road traffic injuries (RTIs), making it the eighth leading cause of death globally. Low- and middle income countries (LMICs) have lower rates of vehicle ownership compared to high-income countries (HIC), but over 90% of RTI fatalities occur in LMICs with the highest death rates in Africa. Individuals from lower socioeconomic backgrounds living in HICs are also more likely to be involved in a road crash resulting in injuries. RTIs make up a major proportion of a country's economic and social burden,(2-4) and account for almost 30% of global injury-related disability.(2) In the face of increasing motorisation, achieving absolute reductions in RTIs is a challenge, especially for vulnerable road users such as pedestrians and users of powered two and three wheeler vehicles. This challenge has a direct impact on the UN's Sustainable Development Goals (SDGs), in particularly Target 3.6 which called for a halving of global road deaths by 2020, and Target 11.2 which called for safe and sustainable transport systems, especially for vulnerable road users.(5)

Motor vehicle crashes (MVCs), and by extension RTIs, however, are preventable. Using the Haddon Matrix, an early theory describing the multifactorial nature of RTIs, MVCs are understood to involve host (human), agent (vehicles and equipment), and environmental (physical and socioeconomic) factors(6). This theory has since been used to build the Safe System Approach endorsed in the United Nations Road Safety Collaboration's Decade of Action for Road Safety (2011-2020).(7) In brief, the Safe System Approach aims to prevent MVCs which result in serious injuries or death by addressing four main pillars of focus: 1) safe roads, 2) safe speeds, 3) safe people and 4) safe vehicles.(8) Road safety programs, such as the *Bloomberg Initiative for Global Road Safety (2015-2019)* focus on improving road safety through legislation in LMICs,(9) thus addressing the environmental and agent risks of RTIs. Beyond road infrastructure and vehicle quality, human driving behaviours or 'human factors' also contribute to RTI rates and are an intrinsic part of the Safe System Approach. Safe driving requires individuals to have a range of physical, visual, and cognitive skills. In addition to specific eye diseases, age-related functional declines across a range of domains, including vision, can reduce confidence in driving ability.(10) Poor visual acuity and contrast sensitivity, visual field loss, and glare sensitivity have all been identified as potential factors contributing to poor driving performance and increased MVCs.(11)

Due to the high visual demands needed to drive safely, many countries have set federal and or state-specific standards for vision, mostly for visual acuity. Most countries accept that a visual acuity of at least 6/12 (0.50, 20/40) in the better eye as the requirement for driving. This threshold dictates jurisdictional control used to identify individuals with vision impairment and restrict their access to

1  
2  
3 driving privileges. However, a systematic review by Dobbs (2008) suggested that licencing policies  
4 aimed at identifying at-risk older drivers may not be effective in decreasing crash rates.(12) This  
5 may be because policies which govern licensure and vision screening vary significantly between and  
6 within countries. Further, evidence on their effectiveness is inconclusive.(13) Conversely, in-person  
7 renewal policies which include vision tests completed at licence renewal centres, have been shown  
8 to reduce crash rates in older drivers.(14) An American study analysing data from the National  
9 Highway Traffic Safety Administration Fatal Accident Reporting System found drivers aged 70 years  
10 and older who underwent visual acuity examinations during their licence renewals had lower fatal  
11 crash risks than their non-vision tested peers (RR 0.93; 95% CI 0.89 – 0.97).(15) However, the  
12 literature remains divided in its support for using visual acuity alone as a predictor of MVC  
13 involvement and high-risk driving behaviours.(16) A Cochrane review, updated twice, examined the  
14 benefits of different vision screening procedures, such as visual acuity, visual field (central or  
15 peripheral), contrast sensitivity, and useful field of view (UFOV) tests, in randomised-controlled trials  
16 (RCTs) aimed at preventing RTIs and fatalities in older drivers.(13, 17) Unfortunately, no RCTs met  
17 the inclusion criteria for the review at the time these reviews were conducted.

18  
19  
20  
21  
22  
23  
24  
25  
26  
27  
28  
29  
30  
31  
32  
33  
34  
35  
36  
37  
38  
39  
40  
41  
42  
43  
44  
45  
46  
47  
48  
49  
50  
51  
52  
53  
54  
55  
56  
57  
58  
59  
60  
There is substantial literature investigating how vision impairment, and other aspects of function,  
affect road safety. Measures of driving safety have included indirect measures such as performance  
on driving simulators, on-road driving assessments, naturalistic driving or in-vehicle monitoring as  
well as direct measures of RTI and MVC rates from self-report or administrative datasets.(18, 19)  
However, the evidence for the influence of vision loss on MVCs and the corresponding benefits of  
interventions to restore vision have not been systematically evaluated. Since older drivers have  
higher crash involvement(20) and greater prevalence of eye diseases due to natural age-related  
declines in vision,(21) most research investigate older drivers and their risks of crashes and injuries.  
However, it is important to document the impact of vision impairment across all age groups.  
Further, information is also needed about specific eye diseases and types of vision impairment to  
inform interventions to screen for poor vision in drivers, and interventions to rehabilitate vision,  
thereby enhancing driver safety and continued ability to drive. This is especially important for older  
adults who rely on driving to remain independent and connected with their community. The loss of  
the ability to drive and the eventual retirement from driving has been linked to higher symptoms of  
depression and poorer health in older adults.(22)

The aim of this systematic review is to: 1) describe the associations between vision impairment and  
risk of road crash involvement across the lifespan, and 2) evaluate vision-related interventions to  
reduce crash risk. Secondary outcomes are driving cessation and surrogate measures of crash risk  
such as on-road driving errors.

## METHODS AND ANALYSIS

This systematic review protocol was drafted using the International Prospective Register of Systematic Reviews (PROSPERO) as a guideline and registered in PROSPERO (28/04/2020; CRD42020172153 [[https://www.crd.york.ac.uk/prospero/display\\_record.php?ID=CRD42020172153](https://www.crd.york.ac.uk/prospero/display_record.php?ID=CRD42020172153)]). Any changes to the protocol will be updated in PROSPERO. The protocol is prepared in accordance to the Preferred Reporting Items for Systematic review and Meta-Analysis Protocols (PRISMA-P) statement (Appendix no. 1).(23)

### Eligibility Criteria

This review will include human studies in the English language with full-text available. Unlike the two previous Cochrane reviews which only included RCTs, this review will consider both interventional (RCTs and quasi-experimental) and observational (cohort, cross-sectional, and case-control) studies. Systematic reviews will be included if meta-analysis was performed. For systematic reviews without meta-analysis, the reference list will be examined for potentially relevant articles, but the systematic review itself will not be included. All literature reviews, commentary articles, dissertations, abstracts, editorials, and conference presentations will be excluded.

All studies must report on at least one of the outcome variables, described in the following section, which include MVC involvement and surrogate measures of driving safety such as driving errors and performance scores and driving cessation. Studies investigating either self-regulatory behaviours, such as night driving avoidance and decreasing travel mileage, or self-reported measures of driving safety, will be excluded. To obtain data on driving scores and performance, studies using on-road driving tests, which include closed-circuit routes and those combining both closed and real-road driving tracks, and naturalistic driving with in-vehicle monitoring will be included. Even though closed-circuits may not reflect true on-road driving conditions, tests for common driving maneuvers such as road signage recognition, hazard recognition and avoidance, reversing, and gap perception are able to be recreated on these routes.(24) Driving errors and driving performance scores on the on-road driving tests can come from fitted in-vehicle monitoring technologies or trained observers. To restrict the scope of the study to direct measures of driving, studies which used driving simulators will be excluded as these are laboratory studies with only indirect measures of driving performance. MVC involvement cannot be measured and real-life driving experiences, such as limited exposure to driving at night, in bad weather, or during rush hour, may not be reflected in a simulation.(25) Additionally, the validity of driving simulator results are highly dependent upon the type of simulation program used and what kind of driving manoeuvre is being

1  
2  
3 investigated.(26) As this review is interested in the MVC involvement and driving abilities of  
4 individuals who drive and their habitual vision, studies which simulate impairments in vision will also  
5 be excluded.  
6  
7

8  
9 The population of focus will be drivers of four-wheeled motorised vehicles such as cars, buses, and  
10 trucks. Unlike the two Cochrane reviews mentioned above which only focused on older drivers, this  
11 review will include drivers of all ages. Studies of drivers who have specific medical conditions (e.g.  
12 dementia, epilepsy, stroke, and history of medical events such as syncope), or vision difficulties due  
13 to other medical factors (e.g. hemianopia caused by brain damage) will not be included. Similarly,  
14 articles where vision status is not reported will be excluded.  
15  
16  
17  
18

19 Exposures in the included studies will encompass all types of vision impairment including visual  
20 acuity, contrast sensitivity, visual field loss as well as impairments associated with specific eye  
21 diseases including but not limited to glaucoma, cataracts, aged-related macular degeneration (AMD),  
22 diabetic retinopathy (DR), stereopsis disorders, and colour vision deficiencies. Vision impairments  
23 can be categorised by the specific eye diseases or by specific measures of vision which can negatively  
24 impact normal everyday functioning. Even though it is not necessary for all included studies to  
25 report on vision-related interventions, studies which do report on interventions can include  
26 procedures such as vision screening, refractive correction, cataract surgery or other measures to  
27 restore and improve vision of drivers in order to maintain driving participation, promote safe driving  
28 and reduce risk of crash involvement. The exposure comparators of included studies will be drivers  
29 who either do not have a vision impairment or have not received a vision-related intervention,  
30 within a timeframe chosen by the study in question.  
31  
32  
33  
34  
35  
36  
37  
38  
39

#### 40 **Outcome Measures**

41  
42 The primary outcome measure is MVC involvement including fatal MVC involvement. Data on crash  
43 involvement and its severity can either come from self-reported surveys or data linkage with  
44 government and/or hospital records. Data from self-reported surveys will ensure that MVCs which  
45 were not serious enough to warrant a police or hospital report will be also be included.  
46  
47  
48

49 Driving cessation and surrogate measures of driving safety will be the secondary outcomes. The  
50 surrogate measures of driving safety can include scores of driving performance from on-road driving  
51 tests or 'naturalistic' in-vehicle monitoring looking at manoeuvres such as lane keeping, braking, and  
52 abundance of road signage like traffic lights, stop and give way signs. To account for differences in the  
53 criteria used by trained observers to evaluate the driving performance scores on on-road driving  
54 tests, a pass/fail threshold for driving performance scores specific to this review will be decided  
55 upon by all investigators in order to synthesise results.  
56  
57  
58  
59  
60

## Search Strategy

Electronic database search will be conducted by the Cochrane Eyes and Vision Information Specialist (IG) on Medline (Ovid), EMBASE, and Global Health from their inception to March 2020. Appendices 2, 3, and 4 shows the search strategies for Medline, EMBASE, and Global Health, respectively. Additional potentially relevant studies will be sought by experts in the field by checking the reference lists and citations of included studies, and checking the reference list of narrative systematic reviews identified in the search.

## Data Collection and Analysis

### *Data Management and Selection*

Each title and abstract will be screened by two investigators independently (from HN, KR, JR, JZ, SM, JF, GFK) using Covidence systematic review management software (Veritas Health Innovation, Melbourne, Australia; available at <https://www.covidence.org/home>). Full-text review of potentially relevant articles will then be conducted by two investigators independently. Discrepancies will be discussed and resolved via consultation with a third investigator.

### *Data Extraction*

Data extraction will be completed independently by two investigators (from among the same seven investigators). Data from included studies will be extracted using adaptations of the Joanna Briggs Institute (JBI) template for systematic reviews and observational studies (including cohort, cross-sectional, and case-control studies).(27) Adapted Cochrane templates will be used to extract data from randomized controlled trials and quasi-experimental studies.(28)

### *Quality Assessment*

A quality assessment to determine an overall risk of bias will be carried out on all included studies independently by two investigators (from the seven investigators mentioned previously). Conflicts will be resolved by a third investigator. Relevant JBI critical appraisal tools will be used to evaluate randomised controlled trials, quasi-experimental studies, systematic reviews, cohort studies, cross-sectional studies, and case-control studies.(29)

### *Data Synthesis Strategy*

Measures of association between vision impairment/vision related interventions and MVC involvement, driving cessation and surrogate measures of driving safety will be summarized according to the outcome measures reported in the primary studies. In particular, appropriate hazard ratio (HR), risk ratio (RR), and odds ratio (OR) for binary data and (standardized) mean

1  
2  
3 differences for continuous data will be statistically pooled. When the same outcome is reported as  
4 dichotomous data in some studies and as continuous data in others, these studies will be pooled by  
5 expressing the ORs as standardized mean differences and vice versa.(30) P-values of the driving  
6 outcomes will also be reported where appropriate.  
7  
8  
9

10 Where it is not possible or suitable to statistically pool the studies, a narrative summary of the  
11 findings will be used instead. Narrative summaries will follow the Synthesis Without Meta-analysis  
12 (SWiM) reporting guidelines.(31) Heterogeneity across all included studies with sufficient data will  
13 be assessed clinically, methodologically and statistically. Clinical heterogeneity will be assessed by  
14 comparing the differences between the participant characteristics (e.g. age, sex, eye disease, driving  
15 mileage, licence status or other available measures of driving exposure), interventions and outcomes  
16 measured. The design and quality of included studies will be compared to assess methodological  
17 heterogeneity. Statistical heterogeneity across studies will be explored by formal statistical test of  
18 heterogeneity, subgroup analyses and, if feasible, by meta-regression. Inconsistency of the effect  
19 sizes across the studies will be assessed by the proportion of variability in the effect sizes of the  
20 included studies due to heterogeneity (and not by sampling error) using  $I^2$ . Estimates will be pooled  
21 using random effects models with fixed effect models results also reported regardless of the values  
22 of  $I^2$ , and prediction intervals to allow for expected effects of future studies to be extrapolated based  
23 upon the current evidence.(32)  
24  
25  
26  
27  
28  
29  
30  
31  
32  
33

34 The following outcomes will be assessed using meta-analysis where feasible according to data  
35 availability: crash involvement, driving cessation, and surrogate measures of un-safe driving i.e.  
36 driving errors and driving performance. Furthermore meta-analyses for each of the different eye  
37 diseases, and studies from LMIC settings will also be performed independently for each outcome of  
38 interest if possible. As there is no age restriction on the focus population, results on age will be  
39 synthesised by assessing specific subgroup analysis and/or meta-regression which may partially  
40 explain heterogeneity across studies in the pooled effect size. The Meta-analysis of Observational  
41 Studies in Epidemiology (MOOSE) guidelines will be used to guide reporting.(33) The Grading of  
42 Recommendations Assessment, Development and Evaluation (GRADE) approach will be used to  
43 assess the quality of evidence in the meta-analyses.(34)  
44  
45  
46  
47  
48  
49  
50

51 Sensitivity analysis will be performed on low risk of bias studies whilst the meta-analysis will include  
52 all studies. This will assist with verifying the strength of the study findings and to assess how  
53 different methodologies, sample sizes and statistical analyses have affected this study's results.  
54  
55 Furthermore, funnel plots will be used to assess publication bias.  
56  
57  
58  
59  
60

1  
2  
3 Corresponding authors from publications dated 2010 onwards with missing data of potential use will  
4 be approached via email, up to a maximum of 3 attempts, to request further information. Any  
5 unobtainable data will be noted alongside all attempts to contact the respective authors. Even  
6  
7 though only available data will be used for the meta-analysis, the effects of any missing data will be  
8 considered and their effects discussed in the overall final review.  
9  
10

### 11 **Patient and Public Involvement**

12 This review will only be looking at existing published literature. No patient or public involvement is  
13 currently planned for the design and execution of this review, however public participation may be  
14 sought for this review's dissemination.  
15  
16  
17  
18

### 19 **ETHICS AND DISSEMINATION**

20 As this review will only be focusing on currently published literature, ethics approval is not required.  
21 Results from this systematic review will be published in an open peer-reviewed journal and will form  
22 part of the ongoing *Lancet Global Health* Commission on Global Eye Health.(35) Where relevant, it  
23 will also be presented at conferences.  
24  
25  
26  
27  
28

### 29 **DISCUSSION**

#### 30 **Significance of this review**

31 The findings of this systematic review may influence future road safety and licencing policies on  
32 driving for drivers with vision impairment. By understanding the visual factors contributing to MVCs,  
33 vision-related screening tests for licencing may be reconsidered and updated to increase relevance  
34 to driving safety. As mentioned previously, most reviews on driving with vision impairment have  
35 been limited to older drivers and the effects of different licencing renewal procedures on their  
36 ability to drive. Even though older drivers are at higher risk,(21) this review will seek to capture data  
37 on driving and vision impairment for all age groups.  
38  
39  
40  
41  
42  
43  
44  
45

46 The eligibility criteria for included studies for this review will ensure that global data on vision and  
47 driving will be captured. Currently, MVC-related societal burdens and injury- related disability  
48 burdens in LMICs are poorly understood which may partially explain why cost-effective interventions  
49 in these countries are rarely undertaken.(2) LMICs tend to focus on legislative interventions,  
50 followed by education/training workshops, public awareness campaigns, enforcement measures,  
51 speed control and infrastructure improvements.(36) Current data on human factors specifically  
52 related to vision impairment in LMICs reported in this review may inform future evidence-based  
53 policies on licencing and/or screening policies to address these gaps.  
54  
55  
56  
57  
58  
59  
60



1  
2  
3 Results from this review may also provide additional evidence on the impact of eye-disease specific  
4 interventions on quality of life factors, especially those related to driving and the ability to drive.  
5  
6 Interventions to improve and optimise vision are needed for drivers, in recognition of the  
7  
8 importance of continued safe driving. This greater awareness in turn will also provide evidence for  
9  
10 policies around road safety for individuals with vision impairments.  
11  
12  
13  
14  
15  
16  
17  
18  
19  
20  
21  
22  
23  
24  
25  
26  
27  
28  
29  
30  
31  
32  
33  
34  
35  
36  
37  
38  
39  
40  
41  
42  
43  
44  
45  
46  
47  
48  
49  
50  
51  
52  
53  
54  
55  
56  
57  
58  
59  
60

For peer review only

## REFERENCES

- 1 World Health Organisation. Road Traffic Injuries 2020; <https://www.who.int/news-room/fact-sheets/detail/road-traffic-injuries> (accessed April 2020)
- 2 Bachani AM, Peden M, Gururaj G, et al. Road Traffic Injuries. In: Mock CN, Nugent R, Kobusingye O, Smith KR, eds. Injury Prevention and Environmental Health. Washington (DC): The International Bank for Reconstruction and Development / The World Bank © 2017 International Bank for Reconstruction and Development / The World Bank.; 2017.
- 3 Chen S, Kuhn M, Prettner K, et al. The global macroeconomic burden of road injuries: estimates and projections for 166 countries. *Lancet Planet Health* 2019;3(9):e390-e8. doi: 10.1016/S2542-5196(19)30170-6
- 4 Wijnen W, Stipdonk H. Social costs of road crashes: An international analysis. *Accid Anal Prev* 2016;94:97-106. doi: 10.1016/j.aap.2016.05.005 [published Online First: 3 June 2016]
- 5 United Nations. #Envision2030: 17 goals to transform the world for persons with disabilities; <https://www.un.org/development/desa/disabilities/envision2030.html> (accessed April 2020)
- 6 Haddon W, Jr. Energy damage and the ten countermeasure strategies. *J Trauma* 1973;13(4):321-31. doi: 10.1177/001872087301500407
- 7 The Department of Infrastructure, Regional Development and Communications: Australian Government. Decade of Action for Road Safety 2011-2020 2014; [https://www.infrastructure.gov.au/roads/safety/decade\\_of\\_action/index.aspx](https://www.infrastructure.gov.au/roads/safety/decade_of_action/index.aspx) (accessed April 2020)
- 8 Towards Zero Foundation. The Safe System; <http://www.towardszerofoundation.org/thesafesystem/> (accessed 30 July 2020)
- 9 Global Road Safety Partnership. Bloomberg Initiative for Global Road Safety; <https://www.grsproadsafety.org/programmes/bloomberg-initiative-global-road-safety/> (accessed April 2020)
- 10 Miller SM, Taylor-Piliae RE, Insel KC. The association of physical activity, cognitive processes and automobile driving ability in older adults: A review of the literature. *Geriatr Nurs* 2016;37(4):313-20. doi: 10.1016/j.gerinurse.2016.05.004 [published Online First: 31 May 2016]
- 11 Rubin GS, Ng ES, Bandeen-Roche K, et al. A prospective, population-based study of the role of visual impairment in motor vehicle crashes among older drivers: the SEE study. *Invest Ophthalmol Vis Sci* 2007;48(4):1483-91. doi: 10.1167/iovs.06-0474
- 12 Dobbs BM. Aging baby boomers--a blessing or challenge for driver licensing authorities. *Traffic Inj Prev* 2008;9(4):379-86. doi: 10.1080/15389580802045823
- 13 Desapriya E, Harjee R, Brubacher J, et al. Vision screening of older drivers for preventing road traffic injuries and fatalities. *Cochrane Database Syst Rev* 2014(2):Cd006252. doi: 10.1002/14651858.CD006252.pub3

- 1  
2  
3 14 Grabowski DC, Campbell CM, Morrisey MA. Elderly licensure laws and motor vehicle  
4 fatalities. *JAMA* 2004;291(23):2840-6. doi: 10.1001/jama.291.23.2840  
5  
6 15 Levy DT, Vernick JS, Howard KA. Relationship between driver's license renewal policies and  
7 fatal crashes involving drivers 70 years or older. *JAMA* 1995;274(13):1026-30. doi:  
8 0.1001/jama.1995.03530130032024  
9  
10 16 Owsley C, McGwin G, Jr. Vision impairment and driving. *Surv Ophthalmol* 1999;43(6):535-50.  
11  
12 17 Subzwari S, Desapriya E, Babul-Wellar S, et al. Vision screening of older drivers for  
13 preventing road traffic injuries and fatalities. *Cochrane Database Syst Rev* 2009(1):Cd006252. doi:  
14 10.1002/14651858.CD006252.pub2  
15  
16 18 Imprialou M, Quddus M. Crash data quality for road safety research: Current state and  
17 future directions. *Accid Anal Prev* 2019;130:84-90. doi: 10.1016/j.aap.2017.02.022  
18  
19 19 Kaye SA, Lewis I, Freeman J. Comparison of self-report and objective measures of driving  
20 behavior and road safety: A systematic review. *J Safety Res* 2018;65:141-51. doi:  
21 10.1016/j.jsr.2018.02.012  
22  
23 20 Owsley C, Ball K, Sloane ME, et al. Visual/cognitive correlates of vehicle accidents in older  
24 drivers. *Psychol Aging* 1991;6(3):403-15. doi: 10.1037//0882-7974.6.3.403  
25  
26 21 Wood JM, Black AA. Ocular disease and driving. *Clin Exp Optom*. 2016;99(5):395-401. doi:  
27 10.1111/cxo.12391 [published Online First: 7 May 2016]  
28  
29 22 Ragland DR, Satariano WA, MacLeod KE. Driving cessation and increased depressive  
30 symptoms. *J Gerontol A Biol Sci Med Sci* 2005;60(3):399-403. doi: 10.1093/gerona/60.3.399  
31  
32 23 Shamseer L, Moher D, Clarke M, et al. Preferred reporting items for systematic review and  
33 meta-analysis protocols (PRISMA-P) 2015: elaboration and explanation. *BMJ* 2015;350:g7647. doi:  
34 10.1136/bmj.g7647  
35  
36 24 Wood JM. Age and visual impairment decrease driving performance as measured on a  
37 closed-road circuit. *Hum factors*. 2002;44(3):482-94. doi: 10.1518/0018720024497664  
38  
39 25 Keay L, West SK. Vision and Driving Performance in Elderly. In: Scholl HPN, Massof RW, West  
40 SK eds. *Ophthalmology and the Ageing Society*. Berlin Heidelberg: Springer-Verlag 2013:193-207.  
41  
42 26 Shechtman O, Classen S, Awadzi K, et al. Comparison of driving errors between on-the-road  
43 and simulated driving assessment: a validation study. *Traffic Inj Prev* 2009;10(4):379-85. doi:  
44 10.1080/15389580902894989  
45  
46 27 The Joanna Briggs Institute. Joanna Briggs Institute Reviewer's Manual. 2017. Available from:  
47 <https://reviewersmanual.joannabriggs.org/> (accessed April 2020)  
48  
49 28 Cochrane: Developmental PaLP. Data Extraction Forms 2014 [Available from:  
50 <https://dplp.cochrane.org/data-extraction-forms> (accessed April 2020).  
51  
52 29 University of Adelaide. Critical Appraisal Tools;  
53 [https://joannabriggs.org/ebp/critical\\_appraisal\\_tools](https://joannabriggs.org/ebp/critical_appraisal_tools) (assessed April 2020)  
54  
55  
56  
57  
58  
59  
60

- 1  
2  
3 30 Anzures-Cabrera J, Sarpatwari A, Higgins JP. Expressing findings from meta-analyses of  
4 continuous outcomes in terms of risks. *Stat Med* 2011;30(25):2967-85. doi: 10.1002/sim.4298  
5 [published Online First: 8 August 2011]  
6  
7  
8 31 Campbell M, McKenzie JE, Sowden A, et al. Synthesis without meta-analysis (SWiM) in  
9 systematic reviews: reporting guideline. *BMJ* 2020;368:l6890. doi: 10.1136/bmj.l6890  
10  
11 32 IntHout J, Ioannidis JP, Rovers MM, et al. Plea for routinely presenting prediction intervals in  
12 meta-analysis. *BMJ Open* 2016;6(7):e010247. doi: 10.1136/bmjopen-2015-010247  
13  
14 33 Stroup DF, Berlin JA, Morton SC, et al. Meta-analysis of observational studies in  
15 epidemiology: a proposal for reporting. Meta-analysis Of Observational Studies in Epidemiology  
16 (MOOSE) group. *JAMA* 2000;283(15):2008-12. doi: 10.1001/jama.283.15.2008  
17  
18 34 Iorio A, Spencer FA, Falavigna M, et al. Use of GRADE for assessment of evidence about  
19 prognosis: rating confidence in estimates of event rates in broad categories of patients. *BMJ*  
20 2015;350:h870. doi: 10.1136/bmj.h870  
21  
22 35 Burton MJ, Faal HB, Ramke J, et al. Announcing The Lancet Global Health Commission on  
23 Global Eye Health. *Lancet Glob Health* 2019;7(12):e1612-e3. doi: 10.1016/S2214-109X(19)30450-4  
24 [published Online First: 9 October 2019]  
25  
26 36 Staton C, Vissoci J, Gong E, et al. Road Traffic Injury Prevention Initiatives: A Systematic  
27 Review and Metasummary of Effectiveness in Low and Middle Income Countries. *PloS One*  
28 2016;11(1):e0144971. doi: 10.1371/journal.pone.0144971  
29  
30  
31  
32  
33  
34  
35  
36  
37  
38  
39  
40  
41  
42  
43  
44  
45  
46  
47  
48  
49  
50  
51  
52  
53  
54  
55  
56  
57  
58  
59  
60

1  
2  
3 **Authors' Contributions:** HN, LK, and JR conceived the idea for the review. HN drafted and revised  
4 the protocol with suggestions from LK, JR, JB, KC, GLdT, KR, MJB, JZ, IG, JFM, SM, and GFK who  
5 reviewed the protocol and provided feedback on the draft. IG constructed the search. The final  
6 version of the manuscript was approved by all authors.  
7

8  
9 **Funding Statement:** MJB is supported by the Wellcome Trust (207472/Z/17/Z). JR is a Commonwealth  
10 Rutherford Fellow, funded by the UK government through the Commonwealth Scholarship  
11 Commission in the UK. The Lancet Global Health Commission on Global Eye Health is supported by  
12 The Queen Elizabeth Diamond Jubilee Trust, The Wellcome Trust, Sightsavers, The Fred Hollows  
13 Foundation, The SEVA Foundation, The British Council for the Prevention of Blindness and Christian  
14 Blind Mission.  
15  
16  
17  
18

19 **Acknowledgements:** None.  
20

21 **Competing Interests:** None declared.  
22

23 **Number of Tables:** 0  
24

25 **Number of Figures:** 0  
26  
27

28 **Data Sharing Statement:** Data generated from this review will be available upon reasonable  
29 request from HN.  
30  
31

32 **Word Count:** 3376  
33  
34  
35  
36  
37  
38  
39  
40  
41  
42  
43  
44  
45  
46  
47  
48  
49  
50  
51  
52  
53  
54  
55  
56  
57  
58  
59  
60

### Appendix 1. Preferred Reporting Items for Systematic review and Meta-analysis Protocols (PRISMA-P) 2015 Checklist

| Section and topic                 | Item No | Checklist item                                                                                                                                                                                                                | Page Number |
|-----------------------------------|---------|-------------------------------------------------------------------------------------------------------------------------------------------------------------------------------------------------------------------------------|-------------|
| <b>ADMINISTRATIVE INFORMATION</b> |         |                                                                                                                                                                                                                               |             |
| Title:                            |         |                                                                                                                                                                                                                               |             |
| Identification                    | 1a      | Identify the report as a protocol of a systematic review                                                                                                                                                                      | 1           |
| Update                            | 1b      | If the protocol is for an update of a previous systematic review, identify as such                                                                                                                                            | N/A         |
| Registration                      | 2       | If registered, provide the name of the registry (such as PROSPERO) and registration number                                                                                                                                    | 2, 6        |
| Authors:                          |         |                                                                                                                                                                                                                               |             |
| Contact                           | 3a      | Provide name, institutional affiliation, e-mail address of all protocol authors; provide physical mailing address of corresponding author                                                                                     | 1           |
| Contributions                     | 3b      | Describe contributions of protocol authors and identify the guarantor of the review                                                                                                                                           | 8, 15       |
| Amendments                        | 4       | If the protocol represents an amendment of a previously completed or published protocol, identify as such and list changes; otherwise, state plan for documenting important protocol amendments                               | N/A         |
| Support:                          |         |                                                                                                                                                                                                                               |             |
| Sources                           | 5a      | Indicate sources of financial or other support for the review                                                                                                                                                                 | 15          |
| Sponsor                           | 5b      | Provide name for the review funder and/or sponsor                                                                                                                                                                             | 15          |
| Role of sponsor or funder         | 5c      | Describe roles of funder(s), sponsor(s), and/or institution(s), if any, in developing the protocol                                                                                                                            | 15          |
| <b>INTRODUCTION</b>               |         |                                                                                                                                                                                                                               |             |
| Rationale                         | 6       | Describe the rationale for the review in the context of what is already known                                                                                                                                                 | 4, 5        |
| Objectives                        | 7       | Provide an explicit statement of the question(s) the review will address with reference to participants, interventions, comparators, and outcomes (PICO)                                                                      | 5           |
| <b>METHODS</b>                    |         |                                                                                                                                                                                                                               |             |
| Eligibility criteria              | 8       | Specify the study characteristics (such as PICO, study design, setting, time frame) and report characteristics (such as years considered, language, publication status) to be used as criteria for eligibility for the review | 6, 7        |
| Information sources               | 9       | Describe all intended information sources (such as electronic databases, contact with study authors, trial registers or other grey literature sources) with planned dates of coverage                                         | 6, 8        |

|                                    |     |                                                                                                                                                                                                                                                  |                  |
|------------------------------------|-----|--------------------------------------------------------------------------------------------------------------------------------------------------------------------------------------------------------------------------------------------------|------------------|
| Search strategy                    | 10  | Present draft of search strategy to be used for at least one electronic database, including planned limits, such that it could be repeated                                                                                                       | Appendix no. 2-4 |
| Study records:                     |     |                                                                                                                                                                                                                                                  |                  |
| Data management                    | 11a | Describe the mechanism(s) that will be used to manage records and data throughout the review                                                                                                                                                     | 8                |
| Selection process                  | 11b | State the process that will be used for selecting studies (such as two independent reviewers) through each phase of the review (that is, screening, eligibility and inclusion in meta-analysis)                                                  | 8                |
| Data collection process            | 11c | Describe planned method of extracting data from reports (such as piloting forms, done independently, in duplicate), any processes for obtaining and confirming data from investigators                                                           | 8                |
| Data items                         | 12  | List and define all variables for which data will be sought (such as PICO items, funding sources), any pre-planned data assumptions and simplifications                                                                                          | 6, 7, 8          |
| Outcomes and prioritization        | 13  | List and define all outcomes for which data will be sought, including prioritization of main and additional outcomes, with rationale                                                                                                             | 7                |
| Risk of bias in individual studies | 14  | Describe anticipated methods for assessing risk of bias of individual studies, including whether this will be done at the outcome or study level, or both; state how this information will be used in data synthesis                             | 8, 9             |
| Data synthesis                     | 15a | Describe criteria under which study data will be quantitatively synthesised                                                                                                                                                                      | 8, 9             |
|                                    | 15b | If data are appropriate for quantitative synthesis, describe planned summary measures, methods of handling data and methods of combining data from studies, including any planned exploration of consistency (such as $I^2$ , Kendall's $\tau$ ) | 8, 9             |
|                                    | 15c | Describe any proposed additional analyses (such as sensitivity or subgroup analyses, meta-regression)                                                                                                                                            | 8, 9             |
|                                    | 15d | If quantitative synthesis is not appropriate, describe the type of summary planned                                                                                                                                                               | 2, 9             |
| Meta-bias(es)                      | 16  | Specify any planned assessment of meta-bias(es) (such as publication bias across studies, selective reporting within studies)                                                                                                                    | 8, 9             |
| Confidence in cumulative evidence  | 17  | Describe how the strength of the body of evidence will be assessed (such as GRADE)                                                                                                                                                               | 9                |

## Appendix 2. MEDLINE (OVID) search strategy

1. exp Eye Diseases/
2. exp Cataract Extraction/
3. Lens Implantation, Intraocular/
4. Lenses, Intraocular/
5. cataract\$.tw.
6. ((intraocular or intra ocular) adj3 lens\$).tw.
7. (IOL or IOLs).tw.
8. Vision Tests/
9. Visual Acuity/
10. exp Refractive Errors/
11. Visual Fields/
12. Visual Field Tests/
13. Contrast Sensitivity/
14. Depth Perception/
15. (visual adj2 (acuit\$ or field\$)).tw.
16. contrast sensitivity.tw.
17. (depth perception or stereopsis).tw.
18. ((impair\$ or decreas\$ or declin\$) adj3 (vision or visual\$ or sight\$)).tw.
19. (improv\$ adj3 (vision or visual\$ or sight\$)).tw.
20. ((visual or vision) adj2 function\$).tw.
21. exp Vision, Ocular/
22. Vision Screening/
23. or/1-22
24. Mass Screening/
25. ((eye\$ or sight or vision or visual\$) adj2 (test\$ or screen\$ or exam\$ or diagnos\$ or assess\$)).tw.
26. 24 and 25
27. 23 or 26
28. exp Motor Vehicles/
29. exp Automobile Driving/
30. Accidents, Traffic/
31. (driver\$ or driving).tw.
32. (automobile\$ or car or cars or vehicle\$).tw.
33. (motoring or motorcar or "motor car" or "motor cars").tw.
34. crash\$.tw.
35. ((road or traffic) adj2 injur\$).tw.
36. ((road or traffic or motor) adj2 (accident\$ or incident\$)).tw.
37. ((road or traffic or motor) adj2 collision\$).tw.
38. or/28-37
39. epidemiologic studies/ or case-control studies/ or cohort studies/ or observational study/ or follow-up studies/ or longitudinal studies/ or prospective studies/ or retrospective studies/ or controlled before-after studies/ or cross-sectional studies/ or historically controlled study/ or interrupted time series analysis/
40. epidemiologic methods/ or focus groups/ or interviews as topic/ or exp "surveys and questionnaires"/
41. epidemiologic research design/ or control groups/ or cross-over studies/ or double-blind method/ or meta-analysis as topic/ or network meta-analysis/ or random allocation/ or single-blind method/
42. epidemiologic methods/ or clinical trials as topic/ or feasibility studies/ or multicenter studies as topic/ or pilot projects/ or sampling studies/ or twin studies as topic/



- 1
- 2
- 3 43. randomized controlled trial/ or controlled clinical trials as topic/ or randomized controlled trials
- 4 as topic/
- 5 44. comparative study/ or evaluation studies/ or meta-analysis/ or review/ or multicenter study/ or
- 6 "systematic review"/ or validation studies/
- 7 45. health surveys/
- 8 46. outcome assessment, health care/
- 9 47. risk factors/
- 10 48. self report/
- 11 49. (population or cohort or observation\$ or intervention\$ or prospective or retrospective or
- 12 comparative).tw.
- 13 50. (questionnaire\$ or survey\$).tw.
- 14 51. (randomized or randomised or randomly or RCT).tw.
- 15 52. (systematic review or meta-analysis).tw.
- 16 53. (before adj2 after).tw.
- 17 54. (case\$ adj2 control\$).tw.
- 18 55. (cross adj1 section\$).tw.
- 19 56. or/39-55
- 20 57. 27 and 38
- 21 58. 56 and 57
- 22 59. vehicle-controlled.tw.
- 23 60. (vehicle adj3 inject\$).tw.
- 24 61. 59 or 60
- 25 62. 58 not 61
- 26 63. (animal\$ or mouse or mice\$ or dog or canine or rat or rats or primate\$).ti.
- 27 64. (dry eye or cell\$ or mutation\$ or genes or genome or sequencing).ti.
- 28 65. or/63-64
- 29 66. 62 not 65
- 30 67. limit 66 to english language
- 31 68. exp case reports/
- 32 69. (case adj2 report\$).tw.
- 33 70. 68 or 69
- 34 71. 67 not 70
- 35 72. limit 71 to (editorial or letter)
- 36 73. 71 not 72
- 37
- 38
- 39
- 40
- 41
- 42
- 43
- 44
- 45
- 46
- 47
- 48
- 49
- 50
- 51
- 52
- 53
- 54
- 55
- 56
- 57
- 58
- 59
- 60

### Appendix 3. EMBASE Search Strategy

1. exp eye disease/
2. exp cataract extraction/
3. lens implantation/
4. lens implant/
5. cataract\$.tw.
6. ((intraocular or intra ocular) adj3 lens\$).tw.
7. (IOL or IOLs).tw.
8. vision test/
9. visual acuity/
10. refractive error/
11. visual field/
12. perimetry/
13. contrast sensitivity/
14. depth perception/
15. (visual adj2 (acuit\$ or field\$)).tw.
16. contrast sensitivity.tw.
17. (depth perception or stereopsis).tw.
18. ((impair\$ or decreas\$ or declin\$) adj3 (vision or visual\$ or sight\$)).tw.
19. (improv\$ adj3 (vision or visual\$ or sight\$)).tw.
20. ((visual or vision) adj2 function\$).tw.
21. vision/
22. or/1-21
23. mass screening/
24. ((eye\$ or sight or vision or visual\$) adj2 (test\$ or screen\$ or exam\$ or diagnos\$ or assess\$)).tw.
25. 23 and 24
26. 22 or 25
27. exp car driving/
28. exp motor vehicle/
29. traffic accident/
30. (driver\$ or driving).tw.
31. (automobile\$ or car or cars or vehicle\$).tw.
32. (motoring or motorcar or "motor car" or "motor cars").tw.
33. crash\$.tw.
34. ((road or traffic) adj2 injur\$).tw.
35. ((road or traffic or motor) adj2 (accident\$ or incident\$)).tw.
36. ((road or traffic or motor) adj2 collision\$).tw.
37. or/27-36
38. study design/
39. controlled clinical trial/
40. case control study/
41. cohort analysis/
42. observational study/
43. follow up/
44. longitudinal study/
45. prospective study/
46. retrospective study/
47. epidemiology/
48. cross-sectional study/
49. control group/

- 1
- 2
- 3
- 4 50. crossover procedure/
- 5 51. "meta analysis (topic)"/
- 6 52. network meta-analysis/
- 7 53. randomization/
- 8 54. single blind procedure/
- 9 55. double blind procedure/
- 10 56. "clinical trial (topic)"/
- 11 57. "controlled clinical trial (topic)"/
- 12 58. "randomized controlled trial (topic)"/
- 13 59. "multicenter study (topic)"/
- 14 60. feasibility study/
- 15 61. pilot study/
- 16 62. comparative study/
- 17 63. evaluation study/
- 18 64. multicenter study/
- 19 65. randomized controlled trial/
- 20 66. meta analysis/
- 21 67. "systematic review"/
- 22 68. validation study/
- 23 69. interview/
- 24 70. questionnaire/
- 25 71. outcome assessment/
- 26 72. "systematic review (topic)"/
- 27 73. health survey/
- 28 74. risk factor/
- 29 75. self report/
- 30 76. evidence based practice/
- 31 77. (population or cohort or observation\$ or intervention\$ or prospective or retrospective or
- 32 comparative).tw.
- 33 78. (questionnaire\$ or survey\$).tw.
- 34 79. (randomized or randomised or randomly or RCT).tw.
- 35 80. (systematic review or meta-analysis).tw.
- 36 81. (before adj2 after).tw.
- 37 82. (case\$ adj2 control\$).tw.
- 38 83. (cross adj1 section\$).tw.
- 39 84. or/38-83
- 40 85. 26 and 37
- 41 86. 84 and 85
- 42 87. vehicle-controlled.tw.
- 43 88. (vehicle adj3 inject\$).tw.
- 44 89. or/87-88
- 45 90. 86 not 89
- 46 91. (animal\$ or mouse or mice\$ or dog or canine or rat or rats or primate\$).ti.
- 47 92. (dry eye or cell\$ or mutation\$ or genes or genome or sequencing).ti.
- 48 93. or/91-92
- 49 94. 90 not 93
- 50 95. limit 94 to conference abstract status
- 51 96. 94 not 95
- 52 97. limit 96 to english language
- 53 98. exp case report/
- 54 99. (case adj2 report\$).tw.
- 55
- 56
- 57
- 58
- 59
- 60

1  
2  
3  
4  
5  
6  
7  
8  
9  
10  
11  
12  
13  
14  
15  
16  
17  
18  
19  
20  
21  
22  
23  
24  
25  
26  
27  
28  
29  
30  
31  
32  
33  
34  
35  
36  
37  
38  
39  
40  
41  
42  
43  
44  
45  
46  
47  
48  
49  
50  
51  
52  
53  
54  
55  
56  
57  
58  
59  
60

- 100. or/98-99
- 101. 97 not 100
- 102. limit 101 to (conference paper or "conference review" or editorial or letter or note)
- 103. 101 not 102

For peer review only

#### Appendix 4. GLOBAL HEALTH Search Strategy

1. exp eye diseases/
2. exp vision disorders/
3. cataract\$.tw.
4. ((intraocular or intra ocular) adj3 lens\$).tw.
5. (IOL or IOLs).tw.
6. (visual adj2 (acuit\$ or field\$)).tw.
7. contrast sensitivity.tw.
8. (depth perception or stereopsis).tw.
9. ((impair\$ or decreas\$ or declin\$) adj3 (vision or visual\$ or sight\$)).tw.
10. (improv\$ adj3 (vision or visual\$ or sight\$)).tw.
11. ((visual or vision) adj2 function\$).tw.
12. ((eye\$ or sight or vision or visual\$) adj2 (test\$ or screen\$ or exam\$ or diagnos\$ or assess\$)).tw.
13. or/1-12
14. drivers/
15. vehicles/
16. motor cars/
17. traffic/
18. traffic accidents/
19. (driver\$ or driving).tw.
20. (automobile\$ or car or cars or vehicle\$).tw.
21. (motoring or motorcar or "motor car" or "motor cars").tw.
22. crash\$.tw.
23. ((road or traffic) adj2 injur\$).tw.
24. ((road or traffic or motor) adj2 (accident\$ or incident\$)).tw.
25. ((road or traffic or motor) adj2 collision\$).tw.
26. or/14-25
27. cohort studies/
28. case-control studies/
29. longitudinal studies/
30. retrospective studies/
31. epidemiology/
32. exp clinical trials/
33. randomized controlled trials/
34. feasibility studies/
35. pilot projects/
36. meta-analysis/
37. systematic reviews/
38. reviews/
39. questionnaires/
40. surveys/
41. epidemiological surveys/
42. risk factors/
43. (population or cohort or observation\$ or intervention\$ or prospective or retrospective or comparative).tw.
44. (questionnaire\$ or survey\$).tw.
45. (randomized or randomised or randomly or RCT).tw.
46. (systematic review or meta-analysis).tw.
47. (before adj2 after).tw.
48. (case\$ adj2 control\$).tw.

1  
2  
3  
4  
5  
6  
7  
8  
9  
10  
11  
12  
13  
14  
15  
16  
17  
18  
19  
20  
21  
22  
23  
24  
25  
26  
27  
28  
29  
30  
31  
32  
33  
34  
35  
36  
37  
38  
39  
40  
41  
42  
43  
44  
45  
46  
47  
48  
49  
50  
51  
52  
53  
54  
55  
56  
57  
58  
59  
60

49. (cross adj1 section\$.tw.
50. or/27-49
51. 13 and 26
52. 50 and 51
53. (animal\$ or mouse or mice\$ or dog or canine or rat or rats or primate\$.ti.
54. (dry eye or cell\$ or mutation\$ or genes or genome or sequencing).ti.
55. 53 or 54
56. 52 not 55
57. limit 56 to english language
58. case reports/
59. (case adj2 report\$.tw.
60. 58 or 59
61. 57 not 60
62. limit 61 to (conference or conference paper or conference proceedings or correspondence or editorial or thesis)
63. 61 not 62
